# Supplementary material for: MS4A15 drives ferroptosis resistance through calcium-restricted lipid remodeling
Source: PubMed Central journal article supplement (PMC8901757; doi:10.1038/s41418-021-00883-z), 2021-10-18
Supplement: 41418_2021_883_MOESM1_ESM.pdf [file 41418_2021_883_MOESM1_ESM.pdf]

1 **MS4A15 Drives Ferroptosis Resistance through Calcium-restricted Lipid**  
2 **Remodeling**

3  
4 **Shan Xin<sup>1,2,8</sup>, Constanze Müller<sup>3,8</sup>, Susanne Pfeiffer<sup>1,8</sup>, Vanessa A. N. Kraft<sup>1</sup>,**  
5 **Juliane Merl-Pham<sup>4</sup>, Xuanwen Bao<sup>5</sup>, Regina Feederle<sup>6</sup>, Xiang Jin<sup>7</sup>, Stefanie M.**  
6 **Hauck<sup>4</sup>, Philippe Schmitt-Kopplin<sup>3</sup>, Joel A. Schick<sup>1,\*</sup>**

7  
8  
9 <sup>1</sup> Genetics and Cellular Engineering Group, Institute of Molecular Toxicology and  
10 Pharmacology, Helmholtz Zentrum Munich, Ingolstaedter Landstr. 1, 85764  
11 Neuherberg, Germany

12 <sup>2</sup> Current address: Department of Genetics, Yale University School of Medicine, New  
13 Haven, CT, 06520, USA

14 <sup>3</sup> Research Unit Analytical BioGeoChemistry, Helmholtz Zentrum München,  
15 Ingolstaedter Landstr. 1, 85764 Neuherberg, Germany

16 <sup>4</sup> Research Unit Protein Science, Helmholtz Zentrum München, Ingolstaedter Landstr.  
17 1, 85764 Neuherberg, Germany

18 <sup>5</sup> Department of Medical Oncology, The First Affiliated Hospital, College of Medicine,  
19 Zhejiang University, 310003 Zhejiang, China

20 <sup>6</sup> Monoclonal Antibody Core Facility, Institute for Diabetes and Obesity, Helmholtz  
21 Zentrum München, Ingolstaedter Landstr. 1, 85764 Neuherberg, Germany

22 <sup>7</sup> Ministry of Education Key Laboratory for Ecology of Tropical Islands, College of Life  
23 Sciences, Hainan Normal University, 571158 Haikou, China

24 <sup>8</sup> These authors contributed equally to this work

25 \* Lead contact

26 **Correspondence to: joel.schick@helmholtz-muenchen.de**

27        **ABSTRACT**

28        Ferroptosis is an iron-dependent form of cell death driven by biochemical processes  
29        that promote oxidation within the lipid compartment. Calcium (Ca<sup>2+</sup>) is a signaling  
30        molecule in diverse cellular processes such as migration, neurotransmission, and cell  
31        death. Here, we uncover a crucial link between ferroptosis and Ca<sup>2+</sup> through the  
32        identification of the novel tetraspanin MS4A15. MS4A15 localizes to the endoplasmic  
33        reticulum, where it blocks ferroptosis by depleting luminal Ca<sup>2+</sup> stores and  
34        reprogramming membrane phospholipids to ferroptosis-resistant species. Specifically,  
35        prolonged Ca<sup>2+</sup> depletion inhibits lipid elongation and desaturation, driving lipid droplet  
36        dispersion and formation of shorter, more saturated ether lipids that protect  
37        phospholipids from ferroptotic reactive species. We further demonstrate that increasing  
38        luminal Ca<sup>2+</sup> levels can preferentially sensitize refractory cancer cell lines. In summary,  
39        MS4A15 regulation of anti-ferroptotic lipid reservoirs provides a key resistance  
40        mechanism that is distinct from antioxidant and lipid detoxification pathways.  
41        Manipulating Ca<sup>2+</sup> homeostasis offers a compelling strategy to balance cellular lipids  
42        and cell survival in ferroptosis-associated diseases.

43

44        **Keywords**

45        MS4A15, ferroptosis, calcium, phospholipid, PUFA, MUFA, plasmalogen, cancer,  
46        membrane oxidation

47        **INTRODUCTION**

48        Ferroptosis is a type of oxidative cell death induced by glutathione (GSH) deprivation  
49        or uncontrolled reactive oxygen species (ROS). During ferroptosis, polyunsaturated  
50        phospholipid peroxides induced by reactive iron accumulate to lethal levels, resulting in  
51        membrane lapse <sup>1</sup>. The selenoenzyme glutathione peroxidase 4 (GPX4) is a central  
52        enzyme protecting lipids from oxidative species that uses GSH as an essential cofactor  
53        to convert lipid hydroperoxides to lipid alcohols <sup>2, 3</sup>. Loss of GPX4 activity and  
54        deprivation of GSH both lead to lipoxygenase activation in a process closely linked to  
55        inflammation <sup>4, 5</sup>. Lipoxygenases oxidize polyunsaturated fatty acids (PUFAs) to  
56        generate metabolites which additionally promote calcium (Ca<sup>2+</sup>) influx for the final,  
57        catastrophic phase of cell death <sup>6</sup>.

58        Calcium is a store-operated signal transduction molecule controlling diverse cellular  
59        processes such as growth and migration. It is intricately linked to cancer and the  
60        pathogenesis of degenerative diseases, which feature imbalanced metabolism and  
61        excessive ROS <sup>7-9</sup>. The endoplasmic reticulum (ER) is the main intracellular Ca<sup>2+</sup>  
62        storage site and plays a key role in the maintenance of Ca<sup>2+</sup> homeostasis and regulation  
63        of protein, lipid, and glucose metabolism. In response to extrinsic stimuli, inositol 1,4,5-  
64        trisphosphate (IP<sub>3</sub>) and ryanodine receptors release Ca<sup>2+</sup> from the ER to the cytosol,  
65        whereas the sarco/endoplasmic reticulum Ca<sup>2+</sup>-ATPase (SERCA) pumps Ca<sup>2+</sup> against  
66        the gradient to maintain a concentration difference between the ER lumen and the  
67        cytosol at rest.

68        Previous studies have shown that ER Ca<sup>2+</sup> homeostasis is critical for adipogenesis and  
69        lipid storage <sup>10, 11</sup>. Altering Ca<sup>2+</sup> balance can regulate activity of key enzymes in *de novo*  
70        lipogenesis, including fatty acid synthase (FAS) and stearoyl-CoA desaturase 1 (*Scd1*),  
71        or, induce lipolysis <sup>12, 13</sup>. IP<sub>3</sub> receptor (IP<sub>3</sub>R) mutants have conserved pathways of  
72        energy metabolism, with higher serum triglycerides and free fatty acids in mice <sup>14</sup> and

73 an obese phenotype with enlarged lipid droplets (LDs) and elevated fat storage in  
74 *Drosophila* <sup>15</sup>. As SERCA is solely responsible for transporting Ca<sup>2+</sup> into the ER lumen,  
75 the SERCA inhibitor thapsigargin inhibits early adipogenesis in cultured cells <sup>16, 17</sup>. In  
76 *Drosophila* fat cells, inhibiting dSERCA promotes lipodystrophy, aberrant LD formation  
77 and ectopic lipid accumulation by regulating intracellular Ca<sup>2+</sup> homeostasis <sup>18</sup>.

78 Apart from late stage store-operated calcium (SOCE) induced death <sup>19, 20</sup>, the  
79 intracellular role of Ca<sup>2+</sup> in ferroptosis is obscure, in particular its role in regulating  
80 phospholipids. Phospholipid plasticity, dependent on diet and *de novo* lipogenesis,  
81 contributes to malignant transformation <sup>21-25</sup>. In particular, cancer cells with a higher  
82 degree of saturated membrane phospholipids are protected against ROS <sup>26</sup>. Thus  
83 'front-loading' highly saturated membrane lipids may have the consequence of  
84 eliminating or quenching the primary biochemical substrates of ferroptosis.

85 In this report, we demonstrate that the novel tetraspanin MS4A15 interacts with ER-  
86 resident Ca<sup>2+</sup> regulators to specifically block ferroptosis by altering the lipid profile of  
87 overexpressing cells. MS4A15 belongs to the membrane-spanning 4-domains  
88 subfamily A (MS4A) whose members function within oligomeric complexes. It is  
89 proposed that MS4A proteins act as ion channels through association with other  
90 subunits <sup>27</sup>. Specifically, MS4A1, MS4A2 and MS4A12 have been shown to possess  
91 Ca<sup>2+</sup>-regulating abilities <sup>28-31</sup>.

92 We show here that MS4A15 drives lipid remodeling by depleting luminal Ca<sup>2+</sup>, favoring  
93 accumulation of protective monounsaturated fatty acid (MUFA)-containing  
94 phospholipids and plasmalogen ether lipids while limiting polyunsaturated alkyl chains.  
95 Strikingly, this effect is mimicked by constitutively inhibiting endoplasmic Ca<sup>2+</sup> uptake  
96 with thapsigargin, or by stimulating phospholipase C, which both reduce ER Ca<sup>2+</sup> levels.  
97 Restoration of luminal Ca<sup>2+</sup> homeostasis re-sensitizes *Ms4a15* overexpressing cells,  
98 and extraordinarily, ferroptosis-resistant cell lines. This phenomenon shows that

99 persistent luminal  $\text{Ca}^{2+}$  depletion circumvents synthesis of ferroptosis-sensitive  
100 substrates in human cancer cell lines. This is the first report directly linking modulation  
101 of ER  $\text{Ca}^{2+}$  homeostasis to lipid remodeling and ferroptosis sensitivity.

## 102       **RESULTS**

### 103       ***Ms4a15* expression specifically blocks ferroptosis**

104       *Ms4a15* was identified in a CRISPR activation screen protecting against ferroptosis <sup>32</sup>.  
105       To test if MS4A15 extensively inhibits ferroptosis, we generated pooled *Ms4a15*-  
106       overexpressing mouse immortalized fibroblasts (*Ms4a15* OE) <sup>32, 33</sup> and characterized  
107       resistance to different ferroptosis inducers (1S, 3R)-RSL3 (RSL3), imidazole ketone  
108       erastin (IKE), ferroptosis inducer derived from CIL56 (FIN56), and genetic ablation of  
109       *Gpx4* (Fig. 1A,B) compared to empty vector-containing cells (control). In each case,  
110       elevated *Ms4a15* mRNA expression (~20-fold increase) robustly increased viability  
111       similar to the level of control cells treated with  $\alpha$ -tocopherol ( $\alpha$ Toc), an inhibitor of  
112       ferroptosis <sup>34, 35</sup>. In contrast, *Ms4a15* knockout cells showed no viability change,  
113       however expression was detected only in trace quantities in parental MF cells  
114       (Supplementary Fig. 1A,I). We examined then if *Ms4a15* OE leveraged general  
115       protection against cell death. Resistance to induced apoptosis, necroptosis and several  
116       chemotherapeutic agents was not observed, while partial protection was observed  
117       against staurosporine and paclitaxel (Supplementary Fig. 1B).

118       We next examined glycerophospholipid (GP) oxidation using BODIPY 581/591 C11  
119       (BODIPY-C11). Treatment for 3 h with RSL3 induced robust BODIPY-C11 oxidation in  
120       control cells, while *Ms4a15* OE cells were unchanged (Fig. 1C). We validated  
121       corresponding cell survival under different conditions with propidium iodide (PI), colony-  
122       forming, and 3-dimensional spheroid assays (Fig. 1D,E), all which showed stable  
123       protection by *Ms4a15* OE against ferroptosis.

124       Human MS4A15 protein is 87% identical with mouse (Supplementary Fig. 1C) and  
125       expressed in lung tissue <sup>36</sup>. Conserved protection was observed in human *MS4A15*-  
126       overexpressing (*MS4A15* OE) HT-1080 fibrosarcoma and Calu-1 non-small-cell lung

127 cancer cells treated with IKE (Fig. 1F). However, due to absent *MS4A15* expression in  
128 cell lines (1345 of 1375 have  $\leq 1$  TPM; Fig. 1G)<sup>37,38</sup>, siRNA knockdown cells were not  
129 more sensitive to ferroptotic challenge (Supplementary Fig. 1D). We further noted that  
130 despite high expression in primary adenocarcinomas, *MS4A15* is lost in cultured lung  
131 cancer cell lines in a direct relationship to cell adhesion markers (Supplementary Fig.  
132 1E). A defective cell migration phenotype is thus consistent with decreased  
133 metastasis/increased survival of lung cancer patients with high *MS4A15*-expressing  
134 tumors (Supplementary Fig. 1F,G).

135 Together, these results show that *MS4A15* is linked to cell migration and can robustly  
136 protect against ferroptosis. *MS4A15* protein is increased following ferroptosis induction,  
137 suggesting its presence is instrumental to survival (Supplementary Fig. 1H). Notably,  
138 this resistance is accomplished without substantially affecting regulators of ferroptosis<sup>1</sup>  
139 (Supplementary Fig. 1I).

#### 140 ***MS4A15* associates with ER-resident Ca<sup>2+</sup> regulators**

141 To further investigate its role we immunoprecipitated human FLAG-tagged *MS4A15*  
142 from HEK293T cell lysates and quantified co-eluting proteins (Fig. 2A). Differentially  
143 identified proteins (fold change (FC)  $\log_2(\text{MS4A15}/\text{GFP})$ ) were compared to GFP-  
144 expressing control cells. A robust enrichment was seen for *MS4A15* ( $p = 2.32\text{E-}05$ , two  
145 tailed t-test;  $\log_2\text{FC} = 9.17$ ) while an expected negative enrichment was seen for GFP  
146 ( $p = 0.012$ ;  $\log_2\text{FC} = -3.98$ ).

147 The highest scoring proteins associate with IP<sub>3</sub>-receptors in the ER, including:  
148 TMEM33 ( $p = 4.33\text{E-}06$ ;  $\log_2\text{FC} = 20.46$ ), a Ca<sup>2+</sup> regulator affecting acute kidney  
149 injury<sup>39,40</sup>, ERLINs, which regulate IP<sub>3</sub> receptors, DNAJs regulating degradation, and  
150 ARFs controlling G-protein coupled receptors (GPCRs). Consistent with a proposed

151 role in  $\text{Ca}^{2+}$  regulation, we observed *MS4A15* localization to the ER (Supplementary  
152 Fig. 1J).

153 KEGG pathways from primary lung adenocarcinomas in The Cancer Genome Atlas  
154 (TCGA) <sup>41</sup> showed a strong association of *MS4A15* with smooth muscle contraction  
155 triggered by  $\text{Ca}^{2+}$  release, PPAR signaling, arachidonic acid metabolism, and  $\text{Ca}^{2+}$   
156 signaling (Supplementary Fig. 2A). We also observed a direct correlation between  
157 *MS4A15* and  $\text{Ca}^{2+}$  transporter genes in primary lung tumors (Fig. 2B). Highly co-  
158 regulated genes include *CLIC5*, producing  $\text{PIP}_2$ , a metabolic precursor of  $\text{IP}_3$ ; cardiac  
159 troponin (*TNNC1*), encoding a  $\text{Ca}^{2+}$  buffering protein and *SUSD2* mediating adhesion  
160 (Supplementary Fig. 2B,C). *CLIC5*, *TNNC1* and *SUSD2* also showed strong z-score  
161 correlations in solid tumor regulation of  $\text{Ca}^{2+}$  transport (Supplementary Fig. 2D). Due to  
162 the enrichment of these  $\text{Ca}^{2+}$  modulators, we examined the hallmark Inositol  
163 trisphosphate receptor ( $\text{IP}_3\text{R1}$ ) expression (Fig. 2C). Marked  $\text{IP}_3\text{R1}$  downregulation in  
164 *Ms4a15* OE cells indicated an inverse relationship but only partial co-localization was  
165 evident (Supplementary Fig. 2E). Together with the IP data, this suggests that reduced  
166  $\text{IP}_3\text{R1}$  levels are a consequence of altered  $\text{Ca}^{2+}$  regulation rather than direct interaction.

### 167 ***MS4A15* regulates $\text{Ca}^{2+}$ -mediated ferroptosis**

168 In light of these observations we examined  $\text{Ca}^{2+}$  signaling in *Ms4a15* OE cells.  
169 Extracellular stimuli such as EGF can trigger phospholipase C (PLC) to generate  $\text{IP}_3$ ,  
170 which stimulates cytosolic  $\text{Ca}^{2+}$  release or MAPK/PKC to mediate cellular response <sup>30</sup>.  
171 <sup>42, 43</sup>. We observed in *Ms4a15* OE cells that phospho-ERK levels show a slight  
172 concentration-dependent sensitization to EGF stimulation (Supplementary Fig. 3A).  
173 However, STAT3 and AKT were unchanged, arguing against parallel activation of  
174 signaling pathways.

175 We therefore directly measured  $\text{Ca}^{2+}$  response using the fluorescent sensor GCaMP6s.  
176 In  $\text{Ca}^{2+}$  free medium, bradykinin activates its GPCR, releasing  $\text{Ca}^{2+}$  from ER stores



177 (Fig. 2D). In *Ms4a15* OE cells stimulated with bradykinin, however, the  $\text{Ca}^{2+}$  response  
178 was strikingly reduced (Fig. 2E). Re-addition of  $\text{CaCl}_2$  induced robust transients in  
179 control cells but a limited response in *Ms4a15* OE cells, suggesting the inactivation of  
180 SOCE. The permeant ionophore A23187 corroborated a potent decrease in total  $\text{Ca}^{2+}$   
181 released from *Ms4a15* OE internal stores (Fig. 2E).

182 This profile is similar to that of cells treated with thapsigargin (Tgn), a potent inhibitor of  
183 SERCAs that supply the lumen with  $\text{Ca}^{2+}$  (Fig. 2D,E). Remarkably, Tgn disruption of  
184 ER  $\text{Ca}^{2+}$  import in control cells showed diminished lipid peroxidation corresponding to  
185 treatment duration (Fig. 2F). Whereas simultaneous application of Tgn with RSL3 did  
186 not affect resistance, 7 and 14 days pretreatment comprehensively protected cells. Pre-  
187 treatment with Tgn abolished bradykinin and ionophore-induced store release, but  
188 increased  $\text{Ca}^{2+}$  uptake from the extracellular milieu (Fig. 2E,F). This shows that while  
189 cytosolic  $\text{Ca}^{2+}$  levels in Tgn-treated cells may be partially rebalanced, *Ms4a15* OE cells  
190 are refractory to uptake.

191 We next investigated if *Ms4a15* OE resistance was due to ER- $\text{Ca}^{2+}$  depletion or SOCE-  
192 related effects. Inhibition of SOCE  $\text{Ca}^{2+}$  import by  $\text{CoCl}_2$  as well as forced influx via  
193 ionophore did not markedly affect *Ms4a15* OE cell sensitivity (Supplementary Fig.  
194 3B,C). In addition, rapid uptake store-operated membrane channel (*Orai*) expression  
195 was virtually unchanged, consistent with unchanged ferroptosis sensitivity upon SOCE-  
196 inhibition with BAPTA-AM (Supplementary Fig. 3D,E). Together with Tgn-mediated  
197 survival, these outcomes indicate SOCE does not contribute to ferroptosis resistance  
198 in these cells.

199 From this, we reasoned that Tgn and *Ms4a15* OE may limit lipid oxidation via persistent  
200  $\text{Ca}^{2+}$  depletion. We therefore tested if restoration of ER  $\text{Ca}^{2+}$  levels could re-sensitize  
201 *Ms4a15* OE cells. Strikingly, elevating SERCA2 in *Ms4a15* OE and control cells  
202 recapitulated parental Bradykinin-mediated  $\text{Ca}^{2+}$  release and sensitized cells to RSL3-

203 induced ferroptosis (Fig. 2G, Supplementary Fig. 3F), indicating that replenishing ER  
204  $\text{Ca}^{2+}$  stores can re-sensitize cells.

205 Aberrant ER  $\text{Ca}^{2+}$  homeostasis is associated with stress and the unfolded protein  
206 response (UPR) <sup>44</sup>, thus we examined hallmarks of UPR, *Xbp1* splicing and *Chop/Ddit3*  
207 and *Gadd34/Ppp1r15a* expression but could not discern UPR activation  
208 (Supplementary Fig. 3G,H). Moreover, short- and long-term tunicamycin treatments  
209 that trigger ER stress via UDP-HexNAc inhibition were ineffective against ferroptosis  
210 (Supplementary Fig. 3I). Taken together, we conclude that persistent disruption of ER  
211  $\text{Ca}^{2+}$  homeostasis in *Ms4a15* OE and Tgn-treated cells leads to ferroptosis resistance  
212 in a manner unrelated to ER stress.

### 213 **MS4A15 regulates lipid saturation and length**

214 MS4A15 informatics revealed a role for  $\text{Ca}^{2+}$  in the biosynthesis of ER-synthesized  
215 lipids (Supplementary Fig. 2A). We investigated if  $\text{Ca}^{2+}$  dyshomeostasis in *Ms4a15* OE  
216 cells and Tgn-treated cells impacts cellular lipid composition. We performed LC-MS<sup>2</sup>  
217 based lipidomics to broadly examine lipid types <sup>45</sup> and chose a 16 h treatment (Tgn<sup>long</sup>)  
218 time point to minimize secondary effects. Unsupervised statistical analysis of >4600  
219 extracted lipid species revealed a clear association of *Ms4a15* OE with Tgn<sup>long</sup> samples  
220 in both modes, whereas 3 h treatment (Tgn<sup>short</sup>) delivered comparable lipid profiles to  
221 vehicle-treated controls (Fig. 3A, Supplementary Fig. 4A,B, Supplementary Table 1).

222 We focused on shared lipid modifications in *Ms4a15* OE and Tgn<sup>long</sup> as well as  
223 exclusively dysregulated lipids in *Ms4a15* OE (Fig. 3B). Classes of significantly altered  
224 species are shown for lipids downregulated in *Ms4a15* OE and Tgn<sup>long</sup> (group I), those  
225 exclusively enriched in *Ms4a15* OE (group II), and those enriched in both *Ms4a15* OE  
226 and Tgn<sup>long</sup> (group III) (ESI+, Fig. 3C; ESI-, Supplementary Fig. 4C). The data show the  
227 vast majority of modulated lipids are glycerophospholipids (GP), followed by several  
228 free fatty acid (FA) species (Fig. 3D).

229 *Ms4a15* OE delivered a different free FA profile compared to control cells. Significant  
230 increases of the main saturated FAs, palmitic (C16:0) and stearic (C18:0) acid, were  
231 observed while PUFA fatty acids such as arachidonic (20:4, AA), andrenic (22:4),  
232 eicosapentaenoic acid (20:5, EPA), docosapentaenoic acid (22:5, DPA), and  
233 doxosahexaenoic acid (22:6, DHA) were decreased. Tgn<sup>long</sup> cells shared a similar albeit  
234 less robust profile than *Ms4a15* OE, possibly due to the abbreviated treatment  
235 (Fig. 3D).

236 A Kendrick plot (Fig. 3E) revealed a marked decrease in higher molecular weight  
237 PUFA-containing glycerophospho-ethanolamines (PEs) and -cholines (PCs) esters in  
238 *Ms4a15* OE cells. In addition, we observed decreased esterified PUFAs in all GP  
239 classes, glycerolipids (GL) as well as in lyso-species (Fig. 3E, Supplementary Fig.  
240 4D-J). Notably, the decrease in PUFA-containing species was accompanied by an  
241 increase in MUFA- and saturated acyl-containing GPs (SFA). These lipids suggest  
242 increased dependence on *de novo* synthesis, as they are highly enriched in breast  
243 cancer tumors<sup>24</sup>. An elegant ferroptosis-protective mechanism of exogenous MUFA  
244 supplementation resulting in PUFA downregulation has recently been elucidated<sup>46</sup>.

245 A distinct enrichment of ether lipids – specialized GPs with an *sn*-1 ether linkage – was  
246 seen for all fatty acids compositions (Fig. 3F,G; 'e' indicating 'ether'). The total ether  
247 lipid pool was upregulated in *Ms4a15* OE and Tgn<sup>long</sup> conditions: 25% in controls versus  
248 36% in *Ms4a15* OE, and Tgn<sup>short</sup> 25% versus Tgn<sup>long</sup> 37% (Fig. 3I). In particular, MUFA-  
249 containing ethers were enriched (Fig. 3G).

250 Ether lipids may consist of alkyl-ether or vinyl-ether moieties, with a double bond  
251 proximal to the oxygen, termed plasmalogens (Fig. 3F). MS<sup>2</sup> cannot differentiate  
252 between isomeric alkyl-ether and vinyl-ether, thus we verified MUFA plasmalogens as  
253 the main species in *Ms4a15* OE cells by acidic hydrolysis (Fig. 3H). Co-elution of a  
254 plasmalogen and an isomeric saturated ether was seen for several species, while many

255 upregulated ethers were entirely plasmalogens (Supplementary Table 2). Consistently,  
256 *Ms4a15* knockout MF cells show a decrease in the same ether species and MUFA-  
257 GPs, however, these lipids were mostly unaffected in knockdown Calu-1 and HT-1080,  
258 in agreement with unchanged viability for these cell lines (Supplementary Fig. 5A,B)

259 Finally, global analysis of non-targeted metabolomics of *Ms4a15* OE showed the most  
260 highly dysregulated metabolites are GP/GL lipids found in LIPID MAPS (Supplementary  
261 Fig. 5C,D, Supplementary Table 3). GSH and ubiquinone (CoQ<sub>10</sub>) metabolites showed  
262 negligible change, further supporting a Ca<sup>2+</sup>-based effect on lipid structure and viability  
263 (Supplementary Fig. 5E).

#### 264 ***Ms4a15* OE ether-MUFAs are anti-ferroptotic reservoirs**

265 To clarify the mechanism of how *Ms4a15* OE cells evade cell death we examined lipid  
266 behavior during ferroptosis. PUFA-containing GPs are characteristic targets for  
267 peroxidation and are consequently degraded<sup>47,48</sup>. Upon ferroptosis initiation, depletion  
268 of PUFA PE was observed in controls as well as several *Ms4a15* OE species (Fig. 4A).  
269 We therefore compared all affected lipid species by global non-supervised principal  
270 component analysis (PCA), resulting in group separation with minimal convergence  
271 (Fig. 4B). This suggests that ferroptosis is classically initiated in cells but peroxidation  
272 degrades additional lipid species in *Ms4a15* OE cells. We therefore investigated their  
273 origin with respect to dysregulated lipids found in the *Ms4a15* OE pool.

274 We found that RSL3-treatment depleted the same lipids increased that are elevated in  
275 *Ms4a15* OE cells (Fig. 3E,3G,4C). We therefore examined if significantly upregulated  
276 and highly abundant lipids are preferred targets of RSL3 (Fig. 4D), however, the pattern  
277 is independent of initial concentration. In *Ms4a15* OE, RSL3 treatment extensively  
278 modifies most ether-lipids and MUFA-containing GPs, rather than single or highly  
279 concentrated species (Fig. 4C-F). However, highly abundant MUFA ester-PC 32:1  
280 ( $\log_2 = 0.39$  increase) and MUFA ether-PC 34:1 ( $\log_2 = 0.89$ ) (Fig. 4E) are depleted by

281  $\log_2 = -0.27$  and  $\log_2 = -0.42$  in *Ms4a15* OE cells treated with RSL3 (Fig. 4F),  
282 respectively, while these same lipids are unaffected in controls. Instead, degradation of  
283 highly abundant PUFA ether-PC 36:4 and PE 36:5 was observed in control cells.

284 We investigated which *Ms4a15* OE lipids are most affected by RSL3 treatment and  
285 observed the largest changes in upregulated ether lipids, both MUFA and PUFA,  
286 suggesting that the plasmalogen vinyl ether bond is reactive with ferroptotic ROS  
287 (Fig. 4A,G-I). The largest change was seen for PE e 36:1 ( $\log_2 = -4.55$ ), highly enriched  
288 in *Ms4a15* OE ( $\log_2 = 2.91$ ), indicating both properties (MUFA and vinyl ether) are adept  
289 at absorbing this reaction.

290 In summary, significantly elevated lipid species in *Ms4a15* OE cells, 16- and 18-carbon  
291 plasmalogens and MUFA-containing GPs, comprise the primary targets of RSL3-  
292 induced degradation in *Ms4a15* OE. This reveals that the ensuing lipid remodeling is  
293 important for ferroptosis protection.

#### 294 **MUFA-plasmalogens protect PEs against oxidation**

295 We further examined the behavior of plasmalogens under oxidizing cell-free conditions  
296 with AAPH in the presence of PEs using BODIPY-C11 as a sensor. Consistent with Zou  
297 et al.<sup>48</sup> we observed increased oxidation in the presence of PUFA-plasmalogen PE  
298 (P-16:0/20:4). However, MUFA-plasmalogen PC (P-18:0/18:1) displayed protection of  
299 BODIPY-C11 oxidation, similar to ferrostatin-1 (Fig. 5A). We examined PE-ester  
300 phospholipid stability by MS<sup>2</sup> and observed that MUFA-plasmalogens strongly  
301 protected against PE decay by AAPH (Fig. 5B). However, exogenous addition to  
302 control cells showed increased lethality for PUFA- but no change for MUFA-  
303 plasmalogens (Supplementary Fig. 5F). This may be due to *sn*-2 remodeling of MUFA-  
304 plasmalogens in cells producing high levels of PUFAs. Nevertheless, minor synergistic  
305 viability was observed only for MUFA-plasmalogen in the presence of  $\alpha$ Toc (Fig. 5C),

306 suggesting (sensitizing) PUFA-lipids are more potent than (protective) MUFA-  
307 plasmalogens.

### 308 **Lipid elongation and desaturation mediate resistance**

309 *Ms4a15* OE lipids are shorter but more saturated (Fig. 3E,G). Thus, these lipids may  
310 derive from *de novo* lipogenesis upon compromised ER-resident elongase and  
311 desaturase activities. Analogously, ML239 agonizes fatty acid  $\Delta 6$  desaturase 2 (FADS2)  
312 activity to increase PUFA synthesis and ferroptosis sensitivity<sup>49</sup>. We considered that  
313 supplementation with free exogenous PUFA fatty acids may overcome protective lipids.  
314 We treated *Ms4a15* OE cells for 48 h with 20:5n-3 (EPA), 22:5n-3 (DPA) and 22:6n-3  
315 (DHA) and observed that longer, more unsaturated DPA and DHA potentiated  
316 ferroptosis more robustly than EPA (Fig. 5D).

317 These data are consistent with elongase and desaturase deficits. Their corresponding  
318 genes are so far absent from ferroptosis screens, possibly reflecting independent  
319 desaturation activities<sup>50</sup>. Accordingly, individual siRNA inhibition of stearoyl-CoA  
320 desaturase 1 (*Scd1*), *Fads2*, or very-long-chain 3-oxoacyl-CoA reductase (*Hsd17b12*)  
321 did not protect against ferroptosis, while pooling all three siRNAs partially protected  
322 (Fig. 5E).

323 *Scd1* and *Fads2* are counterregulated with *Ms4a15* OE and act downstream of key lipid  
324 regulator *Ppar $\gamma$*  to promote lipid droplets (LDs), which are formed in the ER and act as  
325 reservoirs to control lipotoxicity and ER homeostasis under stress. RNAseq revealed  
326 *Ppar $\gamma$*  misregulation in *Ms4a15* OE cells together with genes controlling LD dynamics  
327 (Fig. 5F, Supplementary Fig. 2A), while high-content analysis showed widespread LD  
328 dispersion in *Ms4a15* OE and Tgn-treated cells (Fig. 5G). A significant mean decrease  
329 in number but unchanged area and fluorescent intensity indicated that LDs are  
330 redistributed to smaller droplets in the cytosol rather than lost (Fig. 5H). Collectively,

331 these data show that depletion of ER calcium lead to qualitative changes in ferroptosis-  
332 sensitive lipids in concert with subcellular LD rearrangement.

### 333 **Global Ca<sup>2+</sup> genes define a signature for ferroptosis**

334 We speculated that changes in Ca<sup>2+</sup> homeostasis resulting in ferroptosis-resistant lipids  
335 may contribute to resistance in different cell lines. We tested this theory by cross-  
336 referencing sensitivity of the 100 most RSL3-resistant and -sensitive cancer cell lines  
337 from the CTRP database <sup>49</sup> to KEGG gene expression <sup>37</sup>.

338 Using unsupervised clustering of Ca<sup>2+</sup> genes, we observed segregation corresponding  
339 to sensitivity (Supplementary Fig. 6A, Supplementary Table 4). Several clusters  
340 dominated sensitive lines, in particular coordinated downregulation of *EGFR*, *ERBB2/3*  
341 (*HER2/3*), *ITPR3* (IP<sub>3</sub>R3) and *GNAQ*, coupled to activation of PLC-beta and Ca<sup>2+</sup>  
342 release. Reduced GPCR and PLC subtypes was also prominent among sensitive  
343 hematopoietic/lymphoid-derived cell lines, which favor cadherin/integrin-based homing  
344 and are exquisitely sensitive to ferroptosis <sup>32, 51, 52</sup>. PCA also distinctly separated  
345 resistant and sensitive CTRP cell lines (Fig. 6A). Of these, *ATP2A3* and *PLCG2* were  
346 key drivers of the RSL3 sensitive group, while *EGFR*, *ERBB2/3* and *ADRB2* were in  
347 the RSL3 resistant group. Together, these results are consistent with re-sensitization  
348 of *Ms4a15* OE cells by *Atp2a2/Serca2* overexpression and suggest that signaling  
349 molecules can influence Ca<sup>2+</sup> homeostasis and PUFA/MUFA/plasmalogen ratios.

350 EGFR and EGFR/ERBB3 dimers can activate Ca<sup>2+</sup> release via PLCs. We mimicked this  
351 signal and associated ER Ca<sup>2+</sup> depletion by constitutively activating PLC for 48 h with  
352 *m*-3M3FBS in control cells (Fig. 6B). Extensive ferroptosis protection was observed,  
353 while *o*-3M3FBS (a control for non-specific antioxidant activity) showed no effect,  
354 consistent with observed changes in ether and MUFA-lipids (Fig. 6C). PLCs are  
355 classically coupled to GPCRs, therefore we tested “orphan” GPCR *Olfir39*

356 overexpressing cells identified in the same screen <sup>32</sup> and observed the prototypical  
357 pattern of *Ms4a15* OE in viability, Ca<sup>2+</sup>, and lipid regulation (Supplementary Fig. 6B-D).

358 Given this result, we tested if augmenting ER Ca<sup>2+</sup> could sensitize ferroptosis-resistant  
359 cell lines. We applied PLC inhibitors U73122 and edelfosine for 48 h to broadly inhibit  
360 Ca<sup>2+</sup> release (Fig. 6D,E, Supplementary Fig. 6E). Testing of two resistant breast cancer  
361 cell lines revealed that MDA-MB-231 could be sensitized to RSL3, while MCF-7 cells  
362 were unaffected. MDA-MB-231 are EGFR-addicted cells, whereas MCF-7 are estrogen  
363 dependent. Similarly, lung cancer line NCIH1975 has a high dependency on EGFR <sup>53</sup>  
364 and could be sensitized while A549 could not. Finally, of two investigational cell lines,  
365 HEK293T and HeLa, only HEK293T responded to synthetic sensitization with relevant  
366 lipids plots showing degrees of ether and MUFA-lipid depletion (Fig. 6F). Together,  
367 these results demonstrate that elevating ER Ca<sup>2+</sup> levels by blocking signals at the  
368 membrane can sensitize certain ferroptosis-resistant cell lines.



## 369 DISCUSSION

370 In this report we define a unique mechanism for ferroptosis resistance based on the  
371 discovery of MS4A15, an uncharacterized four-pass membrane protein. MS4A proteins  
372 have previously been proposed to oligomerize into ion channels to facilitate Ca<sup>2+</sup>  
373 movement <sup>27</sup>, however recent work suggests the requirement for other channel  
374 proteins <sup>54</sup>. In contrast to other members at the plasma membrane, MS4A15 is localized  
375 to the ER where it constitutively depletes Ca<sup>2+</sup> stores. Consistent with previous studies  
376 showing that MS4A proteins promote Ca<sup>2+</sup> flux <sup>30, 55, 56</sup>, overexpression of *Ms4a15*  
377 profoundly altered Ca<sup>2+</sup> homeostasis and depressed IP<sub>3</sub>R1 expression, resulting in  
378 extensive lipid remodeling (see graphical summary Fig. 6G). This effect is similar to  
379 treatment with thapsigargin, a specific inhibitor of ER Ca<sup>2+</sup> uptake, and can be reversed  
380 by PLC inhibitors.

381 The primary consequence of decreased luminal Ca<sup>2+</sup> levels is depletion of long PUFA-  
382 GPs in favor of shorter MUFA-GPs and -ether lipids, particularly plasmalogens. Long  
383 chain PUFA-GPs are targets of ferroptosis oxidation in control cells, while *Ms4a15* OE  
384 demonstrate preferential degradation of MUFA-GPs and plasmalogens. Until now,  
385 exogenous MUFAs <sup>57</sup> and nonspecific ether lipids <sup>58</sup> have hinted to ferroptosis  
386 protection. *Ms4a15* OE provides the first demonstration that endogenous MUFAs and  
387 specifically MUFA-plasmalogens are targets of ferroptotic ROS in the low luminal Ca<sup>2+</sup>  
388 state.

389 Plasmalogens have been suspected to harbor antioxidant capacity <sup>59, 60</sup>. In vitro,  
390 plasmalogens delay degradation of *sn*-2 GPs in the presence of oxidants, suggesting  
391 the vinyl ether bond protects against radical-generated oxidation <sup>61</sup>. Importantly, the  
392 antioxidant capacity appears to be intramolecular <sup>62</sup>. Lipid peroxidation propagation is  
393 stopped by the absorption of ROS at delocalized electrons of the vinyl ether bond.  
394 During preparation of this manuscript, PUFA-containing plasmalogens were shown to

395 promote ferroptosis<sup>48</sup>, which complements our findings that alkyl chains strongly dictate  
396 sensitivity. MUFA-plasmalogens, therefore, act as anti-ferroptotic reservoirs by  
397 absorbing ROS and limiting their propagation in the membrane<sup>63</sup>.

398 Disruption of ER Ca<sup>2+</sup> homeostasis has been linked to lipogenesis<sup>18</sup>. Similarly, in rats,  
399 Ca<sup>2+</sup> deficiency leads to loss of long chain PUFAs<sup>64</sup>. Our results suggest that the  
400 activities of elongases and desaturases may require stable luminal Ca<sup>2+</sup> to synthesize  
401 PUFA-containing lipids. Moreover, depletion of Ca<sup>2+</sup> stores causes the dispersion of  
402 lipid droplets, which are tightly coupled to cellular metabolism and storage of diverse  
403 lipid species. In this respect, the lack of PUFAs may be compensated by *de novo*  
404 lipogenesis, driving increased MUFA-GPs and plasmalogens and changes in lipid  
405 droplet dynamics. As LDs sequester not only neutral lipids but also PUFA-containing  
406 phospholipids, these are not released into the fatty acid pool for re-esterification in  
407 membranes as observed in *MS4A15* OE cells. LDs also provide physical separation  
408 from peroxidation at the membrane<sup>65, 66</sup>. Thus, qualitative remodelling of lipids to  
409 MUFA-GPs in *MS4A15* OE cells also triggers a redistribution of LDs, producing smaller,  
410 dispersed lipid droplets that may additionally limit oxidation<sup>65, 67</sup>. However, the  
411 relationship between LD localization and ferroptosis sensitivity is still unexplored.

412 Ferroptosis has been widely linked to cancer, yet how precancerous cells limit  
413 ferroptosis-inducing PUFAs is enigmatic<sup>68</sup>. Our findings linking calcium and ferroptosis  
414 are relevant in this context as the number of oncogenes and tumor suppressors that  
415 control homeostasis and cell death is increasing<sup>69-71</sup>. For instance, the RAS oncogene  
416 limits IP<sub>3</sub>R activity and ER Ca<sup>2+</sup> flux<sup>72</sup>. Analogously, *Serca2* haploinsufficiency and  
417 thapsigargin cause tumors in mice<sup>73 74</sup>. Thus, it is plausible that changes in the  
418 calcium/lipid axis disrupt an endogenous ferroptotic mechanism to abate neoplastic  
419 transformation. Ours and others recent work has demonstrated evidence for  
420 endogenously produced antioxidants to overcome ROS-induced lipid peroxides<sup>32, 75, 76</sup>,

421 or limit PUFA insertion into membranes <sup>77</sup>. Targeting these pathways provides an  
422 opportunity to limit therapy resistance in tumors. Hence, modulating Ca<sup>2+</sup> homeostasis  
423 provides an additional lever to influence cell survival.

424 An overlap between ferroptosis and oxytosis has been suggested as the late lethal  
425 influx of Ca<sup>2+</sup> is conserved in some cells. A conclusion of MS4A15 limiting acute Ca<sup>2+</sup>  
426 flux is nevertheless unlikely. BODIPY-C11 analysis of *Ms4a15* OE cells, in contrast to  
427 short Tgn-treatment, demonstrably lack early-forming oxidized lipids. Moreover, SOCE  
428 blockage did not markedly affect ferroptosis sensitivity while Tgn alters cell viability and  
429 lipid profiles, despite its highly active Ca<sup>2+</sup> uptake. Thus, acute Ca<sup>2+</sup> flux and persistent  
430 Ca<sup>2+</sup> dyshomeostasis are distinct cell death phenomena with the latter primarily  
431 affecting biosynthesis of ferroptosis substrates.

432 In conclusion, MS4A15 unites several distinct ferroptosis phenomena. It coordinates  
433 lipid remodeling by regulating ER Ca<sup>2+</sup> levels, while ER-synthesized MUFA-GPs  
434 and -plasmalogens abate ferroptosis-induced lipid peroxidation. Taken together, these  
435 data strongly support the conclusion that MS4A15 is an independent contributor to  
436 ferroptosis resistance.

## 437 **MATERIALS AND METHODS**

### 438 **Cell lines and culture conditions**

439 Cell lines used in the study: Immortalized conditional *Gpx4* <sup>-/-</sup> mouse embryonic  
440 fibroblasts expressing Cre-ERT2 (MEF, male) <sup>33</sup> were previously generated <sup>32</sup> with the  
441 CRISPR activation system <sup>78</sup> and a mouse *Ms4a15* CRISPR guide (Supplementary  
442 Table 5) for overexpression, Calu-1 (gift from Brent Stockwell), HEK293T (fetal, ATCC  
443 Cat# CRL-3216), H1975 (female, ATCC Cat# CRL-5908); MDA-MB-231 (female,  
444 ATCC Cat# HTB-26), MCF-7 (female, ATCC Cat# HTB-22), HeLa (female, ATCC Cat#  
445 CCL-2), A549 (male, ATCC Cat# CCL-185).

446 Calu-1 cells were maintained in RPMI Medium (Thermo Fisher Scientific) with 15% fetal  
447 bovine serum (FBS, Biochrom). Other cell lines were maintained in DMEM (Thermo  
448 Fisher Scientific) containing 10% FBS. All cells were grown in medium supplemented  
449 with 1% L-Glutamine (Thermo Fisher Scientific) and 1% Penicillin-Streptomycin  
450 (Thermo Fisher Scientific) at 37 °C in a humidified atmosphere of 5% CO<sub>2</sub>. Cell lines  
451 were regularly checked for mycoplasma and morphological conformity with ATCC's  
452 specifications.

453

### 454 **Generation of cell lines**

455 To generate pooled OE cell lines, individual guides were cloned into lenti-  
456 sgRNA(MS2)\_Neo (neomycin resistance substituted for zeomycin in Addgene plasmid  
457 # 61427) and packaged with lentiviral third generation ecotropic system. Control cells  
458 were infected with empty lentivirus. A guide for *Serca2* activation (Supplementary Table  
459 5) was cloned into lenti-sgRNA(MS2)\_Zeo (Addgene plasmid # 61427) <sup>79</sup> to generate  
460 *Ms4a15* + *Serca2* OE cell line via stable infection of the MF *Ms4a15* OE cell line. Cell  
461 pools were selected for one week with 1 mg/mL G418 Sulfate (Geneticin Selective

462 Antibiotic, Thermo Fisher Scientific) and 200 µg/mL Zeo (Thermo Fisher Scientific),  
463 respectively. Viral production and infection were performed as previously reported <sup>32</sup>.  
464 *Ms4a15* CRISPR homozygous mutations (30% efficiency) were generated in parental  
465 MF cells and validated by genotyping PCR and a 17-bp deletion in exon 2 by Tide  
466 (shinyapps.datacurators.nl/tide/). All guides and genotyping primers are listed in  
467 Supplementary Table 5.

468

### 469 **Human *MS4A15* overexpressing HT1080 and Calu-1 cell lines**

470 To generate pooled *MS4A15* overexpressing HT1080 cells, corresponding guides were  
471 cloned into lenti-sgRNA(MS2)\_Neo and packaged with lentiviral third generation  
472 system (see above) and expressed with helper constructs <sup>78</sup>. To generate *MS4A15*  
473 overexpressing Calu-1 cells, a human pLVTHM hMS4A15-FLAG-T2A-neo expression  
474 construct was cloned and lentivirus applied to parental Calu-1 cells and selected with  
475 G418 for 7 days before cell death experiments.

476

### 477 **Generation of monoclonal anti-human *MS4A15* antibody**

478 For generation of monoclonal antibodies against *MS4A15*, a Lou/c rat was immunized  
479 with 40 µg ovalbumin-coupled peptide spanning aa50-62 (AQTPRATQPPDLR) of  
480 human *MS4A15*, 5 nmol CpG (TIB MOLBIOL), and an equal volume of Incomplete  
481 Freund's adjuvant (IFA; Sigma). After 12 weeks, a boost injection without IFA was given  
482 three days before fusion of rat spleen cells with P3X63Ag8.653 myeloma cells.  
483 Hybridoma supernatants were screened in a bead-based flow cytometry assay (iQue,  
484 Intellicyte; Sartorius) on his-tagged, biotinylated peptide captured on streptavidin beads  
485 (PolyAN) and incubated for 90 min with hybridoma supernatant and Atto 488-coupled  
486 isotype-specific monoclonal mouse-anti-rat IgG secondary antibodies. Antibody binding

487 was analyzed using ForeCyt software (Sartorius). Positive supernatants were validated  
488 by Western blot of *Ms4a15* OE and control cell lysates. Hybridoma cells were subcloned  
489 five limiting dilution rounds to obtain the stable monoclonal cell clone MS4A 5E6 (rat  
490 IgG2c/k). Experiments in this work were performed with hybridoma supernatant.

491

## 492 **Assessment of cell viability**

493 Unless indicated otherwise,  $2 \times 10^3$  MF or  $4 \times 10^3$  human cells were seeded in 96-well  
494 plates and treated with the corresponding compounds as indicated in figures and figure  
495 legends. RSL3/IKE was added to the cells one day before Resazurin incubation.  
496 Resazurin (Sigma) was added to a final concentration of 50  $\mu$ M, cell viability was  
497 assessed after 6-8 h incubation. The Envision 2104 Multilabel plate reader  
498 (PerkinElmer) was used for measuring the fluorescence at 540 nm excitation / 590 nm  
499 emission. In general, at least 3 wells under each condition were averaged and all cell  
500 viability results are presented as percentage relative to the respective untreated or  
501 vehicle-treated control as mean  $\pm$  SD. For propidium iodide (PI) stains, cells were  
502 treated with 0.5  $\mu$ M RSL3 overnight and incubated with 3  $\mu$ M PI for 15 min. Cell images  
503 were taken with an Operetta High-Content Screening System (PerkinElmer) with a 20X  
504 objective. For colony-forming assays, cells were treated with 1.25  $\mu$ M RSL3 overnight,  
505 then trypsinized single-cells, diluted 1:300 and seeded into 6-well plates. After 7 d  
506 colonies were stained with cresyl violet and imaged.

507 Three-dimensional spheroids. MF control and *Ms4a15* OE cells were seeded into the  
508 GravityTRAP ULA 96-well plates (InSphero/PerkinElmer) to form 3D spheroids.  
509 Interwell variations <10% were confirmed and spheres were grown for 4 days, treated  
510 with 2  $\mu$ M RSL3 for additional 16 h and stained with PI. Spheroids were imaged directly  
511 with an Operetta High-content system. Images from a single plate were acquired using  
512 Brightfield and PI channels and 20x High-NA objective in wide field mode. Ten planes

513 of each sample were tracked and four replicates per cell condition were collected with  
514 the same parameters and PI intensity of different cell conditions were analyzed with  
515 Harmony software (PerkinElmer) using the same settings to optimize the results.

#### 516 **siRNA knockdown**

517 Mission esiRNAs targeting human *TMEM33* (EHU035611), *EGFP* (EHUEGFP), murine  
518 *Tmem33* (Emu078331), murine *Fads2* (EMU027741), murine *Scd1* (EMU023031) and  
519 murine *Hsd17b12* (EMU064031) were purchased from Sigma.  $1.5 \times 10^5$  cells were  
520 typically seeded in 6-well plates one day before. Prior to transfection, 200 ng of siRNA  
521 and 3  $\mu$ l Lipofectamine RNAiMAX Transfection Reagent (Thermo Fisher Scientific)  
522 were mixed and incubated at room temperature for 15 min in serum-free media, then  
523 added dropwise on top of the cells. After 48 h transfection, cells were harvested for  
524 subsequent experiments.

525

#### 526 **Quantitative PCR**

527 Total RNA was isolated with the InviTrap Spin Universal RNA Mini Kit (Stratec).  
528 Random hexamer primer and AMV Reverse Transcriptase (NEB) were used for reverse  
529 transcription. Quantitative PCR reactions were carried out using the LightCycler480  
530 (Roche) with Power SYBR Green PCR Master Mix (Thermo Fisher Scientific). Using  
531 *GAPDH* or *Actin* as a reference gene, the relative expression levels compared to the  
532 control were calculated by the  $\Delta\Delta C_p$  method. Primer sequences are listed in  
533 Supplementary Table 5.

534

#### 535 **Lipid peroxidation analysis by flow cytometry**

536 Cells were seeded in 6-well plates to reach 70% confluency. The next day, 0.3  $\mu$ M  
537 RSL3 was added for 3 h. Cells were loaded with 2  $\mu$ M BODIPY 581/591 C11 (Thermo  
538 Fisher Scientific) for 30 min and harvested for analysis on an Attune acoustic flow  
539 cytometer (Applied Biosystems). At least 30,000 events per condition were collected  
540 from the BL-1 channel (excited by 488 nm laser). Each experiment was repeated at  
541 least three times independently and representative results are shown.

542

### 543 **Intracellular calcium measurements**

544 Cells containing the cytosolic calcium sensor GCaMP6s were seeded the day before in  
545 10 cm dishes to reach 70% confluency. The following day, cells were treated with  
546 Accutase (Sigma) and resuspended in PBS, washed twice with  $\text{Ca}^{2+}$ -free buffer (NaCl  
547 116 mM, KCl 5.6 mM,  $\text{MgCl}_2$  1.2 mM,  $\text{NaHCO}_3$  5 mM,  $\text{NaH}_2\text{PO}_4$  1 mM, HEPES 20 mM,  
548 Glucose 1 g/L). Cell pellets were resuspended in 2 mL of  $\text{Ca}^{2+}$ -free buffer and were  
549 analyzed with a BD FACSCanto II (Becton Dickinson). Untreated cell suspensions were  
550 recorded for 2 min (approx. 2,000 events/second) to establish a baseline signal.  $\text{Ca}^{2+}$   
551 release mediated by Bradykinin (Sigma) and Ionophore (Sigma) was measured for 4  
552 and 6 min, respectively. After Bradykinin stimulation, 2 mM  $\text{CaCl}_2$  was added to the  
553 cells and data for the uptake of  $\text{Ca}^{2+}$  was collected for additional 9 min. Kinetic data  
554 were created by FlowJo V10 of viable, GFP positive cells and exported for visualization  
555 to GraphPrad Prism 8. All experiments were repeated at least three times.

556



557 **AAPH oxidation assay using BODIPY 581/591 C11**

558 Ester lipids, plasmalogens and ferrostatin (fer-1) were added into 150  $\mu$ L PBS as  
559 indicated to achieve 150 ppm, 150 ppm and 9 ppm, respectively. Freshly dissolved  
560 1.875  $\mu$ M BODIPY 581/591 C11 in 150  $\mu$ L PBS and 7.5 mM 2,2'-  
561 Azobis(2- amidinopropane) dihydrochloride (AAPH, VWR International) in 150  $\mu$ L PBS  
562 were separately added to start the oxidation. PBS containing the same ratios of  
563 ethanol/methanol/DMSO served as control. After mixing thoroughly, reaction samples  
564 were incubated in the dark for 30 min at room temperature. 100  $\mu$ L sample per well was  
565 measured using an Envision 2104 System (PerkinElmer) in black 96-well plates as  
566 triplicates. Fluorescence intensity at excitation 495 nm / emission 520 nm was  
567 evaluated and normalized to ethanol/methanol/DMSO control. Ferrostatin-1 was used  
568 as an antioxidant positive control.

569

570 **Lipid cell assays**

571 20mM PUFA lipids were mixed with 2.5 mM BSA at a ratio of 1:4 and incubation at  
572 37 °C for 45 min, pre-warmed media was subsequently added into the mixture. *Ms4a15*  
573 OE cells were pre-seeded the day before, the PUFA/BSA mixture was added to the  
574 cells to achieve a final PUFA concentration of 25  $\mu$ M. After 48 h incubation, cells were  
575 challenged with 2  $\mu$ M RSL3.

576 For plasmalogen experiments, MF control cells were seeded the day before on 96-well  
577 plates. The following day, cells were washed with PBS and incubated with 25  $\mu$ M  
578 plasmalogens in serum-free medium for 8 h. After serum starvation, 10% FBS was  
579 added back and the cells were treated with RSL3 and aToc to achieve final  
580 concentrations as indicated. Cell viability assay was performed as described above.

581

582 **EGF signaling in cultured cells**

583 MF cells were pre-seeded in 6-well plates one day before for reaching 70% confluency.  
584 The culture medium was changed to serum-free medium and incubated at 37 °C for 4 h  
585 starvation. Subsequently, the serum-starved MF cells were stimulated with 0-5 ng/mL  
586 EGF for 10 min at 37 °C, washed with PBS and lysed for western blot analysis.

587

588 **Western blotting**

589 Cells were lysed for 20 min in lysis buffer (63 mM Tris-HCl, pH 6.8, 10% glycerol, 2%  
590 SDS, 2.5% DTT and 1x protease inhibitor tablet (Roche)) and DNA was shredded with  
591 a sonicator. After separation on a 6-12% SDS-PAGE gel according to the protein sizes,  
592 proteins were transferred to PVDF membranes. After blocking with 5% non-fat milk for  
593 1h at room temperature, the membranes were incubated in specific primary antibodies  
594 diluted in 2.5% BSA at 4 °C overnight. The next day, membranes were incubated with  
595 secondary antibodies for 2 h at room temperature. ECL prime Western blotting  
596 detection reagents (Bio-Rad) were used at a ratio of 1:1 for chemiluminescence  
597 detection. Each experiment presented was repeated at least three times. Primary  
598 antibodies used in this study: MS4A15 (HMGU, N/A,1:10), ATP2A2 (Elabscience, E-  
599 AB-30196, 1:250), FLAG (Sigma, F7425, 1:2000), MYC (Abcam, ab206486, 1:2000),  
600 ERK1/2 (Cell Signaling, 4696, 1:1000), pERK1/2 (Cell Signaling, 9101, 1:1000), STAT3  
601 (Cell Signaling, 9139, 1:1000), pSTAT3 (Cell Signaling, 4113,1:1000), AKT (Cell  
602 Signaling, 9272, 1:1000), pAKT (Cell Signaling, 9271,1:1000),  $\beta$ -Actin (Cell Signaling,  
603 3700, 1:2000), alpha-Tubulin (Cell Signaling, 2125, 1:2000) and Vinculin (Abcam,  
604 ab130007, 1:500).

605

606 **Confocal microscopy and immunofluorescence**

607 Cells were plated at a density of  $4 \times 10^3$  cells/well on 96-well plates (Perkin Elmer Cell  
608 Carrier Ultra Viewer). Cells were transfected with corresponding expression constructs  
609 for 24 h before 4% formaldehyde fixation. Images were taken with a laser scanning  
610 confocal microscope (Olympus FluoView 1200; Olympus Corporation). Nuclei were  
611 labeled with DAPI staining (blue). MS4A15 was visualized with Anti-FLAG antibody  
612 (Sigma F7425; 1:500) and a secondary goat anti rabbit antibody (Cy3 Jackson Immuno  
613 111-165-003; 1:500). TMEM33 was visualized with Anti-MYC tag antibody (Abcam  
614 9E10; 1:200) and a secondary donkey anti-mouse antibody (Alexa 647 Invitrogen A-  
615 32733; 1:500). IP<sub>3</sub>R1 was visualized with anti-IP3R1 antibody (Biozol BLD-817701;  
616 1:500) and a secondary donkey anti-mouse antibody (Alexa 647 Invitrogen A-32733;  
617 1:500). ER was tracked with ER marker Concanavalin A/Alexa fluor 488 conjugate  
618 (Invitrogen C11252; 100 µg/mL).

619

620 **Lipid droplets analysis by high content imaging**

621 Cells were seeded in 96-well plates to reach 80% confluency. The next day, cells were  
622 loaded with 2 µM BODIPY 493/503 for 30 min and washed with PBS twice before  
623 fixation. The images were taken using an Operetta High-Content Screening System  
624 (PerkinElmer) with GFP filter (excitation 488 nm, emission 509 nm) with the same  
625 parameters.

626

627 **High-resolution high-speed time-lapse live cell imaging**

628 High-throughput wound healing assay: culture-Inserts (ibidi 80209) were used to create  
629 a 500 µm gap, in two reservoirs for culturing cells.  $8 \times 10^3$  MF cells were seeded in each

630 reservoir and cultured for 24 h until they attached in monolayers. The cells were imaged  
631 at 20x magnification after inserts removal using an Operetta High-Content Screening  
632 System (PerkinElmer) equipped with digital phase contrast (DPC) for live-cell imaging.  
633 Eight images per well were collected with the same parameters and analyzed with  
634 Harmony software (PerkinElmer) using the same settings to optimize the comparison  
635 results between different cell lines.

636

### 637 **RNA-Seq**

638 RNA-Seq was performed as described earlier<sup>80</sup>. Briefly, RNA was isolated from whole-  
639 cell lysates using InviTrap Spin Universal RNA Mini Kit (Stratagene) according to the  
640 manufacturer's instructions. For library preparation, 1 µg of RNA was poly(A) selected,  
641 fragmented, and reverse transcribed with the Elute, Prime, Fragment Mix (Illumina).  
642 End repair, A-tailing, adaptor ligation, and library enrichment were performed as  
643 described in the Low Throughput protocol of the TruSeq RNA Sample Prep Guide  
644 (Illumina). RNA libraries were assessed for quality and quantity with the Agilent 2100  
645 BioAnalyzer and the Quant-iT PicoGreen dsDNA Assay Kit (Life Technologies). RNA  
646 libraries were sequenced as 100 bp paired-end runs on an Illumina HiSeq4000  
647 platform.

648

### 649 **Immunoprecipitation assay**

650 HEK 293T cells were seeded at  $1 \times 10^6$  cells per well in 10 cm plates the day before.  
651 Transfection was performed in triplicates with 10 µg of each plasmid (GFP and  
652 MS4A15) using Lipofectamine 2000 following the manufacturer's instructions. Cells  
653 were harvested after 24 h in PBS and crosslinked using 1% formaldehyde at room  
654 temperature for 7 min, followed by 3 min centrifugation at 1,800 x g. Supernatant was

655 removed and the reaction was quenched with 0.5 mL ice-cold 1.25 M glycine/PBS.  
656 Cells were washed once in 1.25 M glycine/PBS and lysed for 60 min on ice with  
657 homogenization in 1 mL RIPA buffer (50 mM Tris HCl, pH 8.0, 150 mM sodium chloride,  
658 1% NP40, 0.5% sodium deoxycholate, 0.1% SDS, 1 mM EDTA, protease inhibitors  
659 (Complete mini, EDTA-free, Roche)). Spun for 30 min at 20,000 x g to remove insoluble  
660 debris, the lysates were precleared by incubation for 2 hours with 20 µl protein G  
661 agarose beads (Protein A/G PLUS-Agarose, Santa Cruz). The precleared lysates were  
662 incubated with 2 µl FLAG (Sigma, F7425) antibody for 1 h, subsequently 20 µl of beads  
663 were added and immunoprecipitation was performed overnight. All steps were carried  
664 out with mild agitation at 4 °C. The beads were washed three times with RIPA buffer  
665 and incubated in 1 x Roti Loading Dye (Carl Roth) at 65 °C for 5 min. Samples were  
666 stored at - 80 °C for mass spectrometric analysis.

667

#### 668 **Quantitative mass spectrometry in data - dependent acquisition mode**

669 Dried beads after pulldown of MS4A15 from formaldehyde-fixed samples were  
670 resuspended in 50 µL 1x Laemmli and de-crosslinked for 60 min at 99 °C. after  
671 reduction and alkylation using DTT and IAA, the proteins were centrifuged on a 30 kDa  
672 cutoff filter device (Sartorius), washed twice with UA buffer (8 M urea in 0.1 M Tris/HCl  
673 pH 8.5) and twice with 50 mM ammoniumbicarbonate. The proteins were digested for  
674 2 h at room temperature using 0.5 µg Lys-C (Wako Chemicals) and for 16 h at 37 °C  
675 using 1 µg trypsin (Promega). After centrifugation (10 min at 14,000 g) the eluted  
676 peptides were acidified with 0.5% TFA and stored at -20 °C.

677 LC-MS/MS analysis was performed on a Q-Exactive HF mass spectrometer (Thermo  
678 Scientific) online coupled to an Ultimate 3,000 nano-RSLC (Thermo Scientific). Tryptic  
679 peptides were automatically loaded on a C18 trap column (300 µm inner diameter (ID)

680 x 5 mm, Acclaim PepMap100 C18, 5  $\mu\text{m}$ , 100  $\text{\AA}$ , LC Packings) at 30  $\mu\text{L}/\text{min}$  flow rate  
681 prior to C18 reversed phase chromatography on the analytical column (nanoEase MZ  
682 HSS T3 Column, 100 $\text{\AA}$ , 1.8  $\mu\text{m}$ , 75  $\mu\text{m}\times 250$  mm, Waters) at 250 nl/min flow rate in a  
683 95 min non-linear acetonitrile gradient from 3% to 40% in 0.1% formic acid. Profile  
684 precursor spectra from 300 to 1,500 m/z were recorded at 60,000 resolution with an  
685 automatic gain control (AGC) target of 3e6 and a maximum injection time of 50 ms.  
686 TOP10 fragment spectra of charges 2 to 7 were recorded at 15,000 resolution with an  
687 AGC target of 1e5, a maximum injection time of 50 ms, an isolation window of 1.6 m/z,  
688 a normalized collision energy of 27 and a dynamic exclusion of 30 seconds.

689

## 690 **Metabolomics and proteomics**

691 Briefly,  $1\times 10^7$  *Ms4a15* OE and parental MF cells per replicate ( $n = 5$ ) were lysed and  
692 equal amounts were proteolyzed using a modified FASP procedure<sup>81</sup>. The proteins  
693 were digested for 2 h at room temperature using 0.5  $\mu\text{g}$  Lys-C (Wako Chemicals) and  
694 for 16 h at 37  $^{\circ}\text{C}$  using 1  $\mu\text{g}$  trypsin (Promega), eluted by centrifugation, acidified with  
695 TFA and stored at -20  $^{\circ}\text{C}$ . Peptides were measured on a Q-Exactive HF mass  
696 spectrometer online coupled to an Ultimate 3,000 nano-RSLC (Thermo Scientific) in  
697 data-independent acquisition (DIA) mode as described previously (Lepper et al., 2018).  
698 Raw files were analyzed using the Spectronaut Pulsar software (Biognosys;<sup>82</sup>) with a  
699 false discovery rate setting of < 1%, using an in-house mouse spectral meta library  
700 generated using Proteome Discoverer 2.1 (Thermo Scientific), the Byonic search  
701 engine (Protein Metrics) and the Swissprot Mouse database (release 2016\_02).  
702 Quantification was based on MS<sup>2</sup> area levels of all unique peptides per protein fulfilling  
703 the percentile 0.3 setting. Normalized protein quantifications were exported and used  
704 for calculations of fold-changes and significance values.

705

706 **Metabolite extraction and global metabolomics**

707 *Ms4a15* OE and control were prepared as described <sup>32</sup>. For analysis, cells were  
708 resuspended in 800  $\mu$ L methanol and transferred into beat tubes. Eppendorf cups were  
709 flushed additionally with 200  $\mu$ L to transfer remaining cells. Cells were lysed using  
710 2x15 seconds, below 4 °C (Precellys, Bertin) and centrifuged with 12,000 rpm for  
711 15 min. The supernatant was immediately diluted 1:10 in methanol. Mass spectra were  
712 acquired on a 12T solarix FT-ICR mass spectrometer (Bruker Daltonics) using an  
713 Apollo II electrospray source (Bruker Daltonics), in broad band detection mode with a  
714 time domain transient of 2 Megawords in positive and negative electrospray mode. The  
715 instrument was calibrated with a 1 ppm arginine solution. A mass error below 100 ppb  
716 was achieved. Injected velocity was set to 120  $\mu$ L/h. Mass lists were generated with a  
717 signal-to-noise ratio (S/N) of four, exported, and combined to one data matrix by  
718 applying a 1 ppm window. Ions (m/z mass/charge) were annotated using MasSTRIX  
719 allowing 1ppm mass tolerance. Unidentified metabolites were annotated by elemental  
720 composition using mass-differences based network approach allowing 0.1ppm mass  
721 tolerance <sup>83</sup>.

722

723 **Lipid extraction and global lipidomics**

724 Procedures for lipid extraction and global lipidomics profiling using UPLC-MS were  
725 described previously <sup>45</sup>. In short, we used a two-step MTBE extraction in a cooled  
726 Precellys (Bertin). The organic content was analyzed using data-dependent auto LC-  
727 MS<sup>2</sup> (maXis, Bruker Daltonics) coupled to an UHPLC ACQUITY (Waters) using reverse  
728 phase chromatography (CORTECS UPLC C18 column, 150 mm x 2.1 mm ID 1.6  $\mu$ m,  
729 Waters Corporation) in both positive and negative electrospray modes. The injection  
730 volume was set to 10  $\mu$ L. Lipid elution was achieved using 10mM ammonium formate  
731 and 0.1 % formic acid in 60% acetonitrile/water mixture (A) and in 90%

732 isopropanol/acetonitrile mixture (B) as mobile phase. Quality control consisting of an  
733 aliquot of each sample and pure solvent blanks were used for column equilibration. The  
734 MS analysis alternated between MS and data-dependent MS<sup>n</sup> scans using dynamic  
735 exclusion. Alignment, peak picking and identification as well as quality control  
736 processing was done in Genedata software (Genedata Expressionist 13.5, Genedata).  
737 Retention time and detected m/z were used to annotate lipid species according to the  
738 Lipid Classification System guidelines of LIPID MAPS Structure Database (LMSD)<sup>84</sup>  
739 (max 0.005 Da error), while single lipid species identification was substantiated by MS<sup>2</sup>  
740 fragmentation (see Supplementary Table 2). MS<sup>2</sup> information was first annotated based  
741 on MoNA library with MSPepSearch<sup>85</sup> and with MetFrag<sup>86</sup>, followed by a further  
742 validation by manual curation<sup>87</sup>. Furthermore, the existence of the vinyl ether linkage  
743 was verified via acidic hydrolysis following previously published protocol<sup>88,89</sup>. Samples  
744 were evaporated and reconstituted in methanol prior MS analysis. Under the chosen  
745 conditions, only vinyl ether linkages in plasmenyl-compounds are cleaved. Ether and  
746 ester bindings stay intact.

747

## 748 **QUANTIFICATION AND STATISTICAL ANALYSIS**

### 749 **Statistics summary**

750 Unless otherwise stated, general statistical analyses and data visualization were  
751 performed in GraphPad Prism version 8.0 and R version 3.6.3. All of the statistical  
752 details can be found in the figures, figure legends, and results, including the statistical  
753 tests used, exact *p*-values, and dispersion and precision measures. Curve statistics  
754 were performed in GraphPad Prism using Two-way ANOVA and Tukey's multiple  
755 comparisons test.

756



757 **RNAseq analysis**

758 The STAR aligner <sup>90</sup> (version 2.4.2a) with modified parameter settings (--  
759 twopassMode=Basic) is used for split-read alignment against the mouse genome  
760 assembly mm10 and UCSC knownGene annotation. To quantify the number of reads  
761 mapping to annotated genes we use HTseq-count <sup>91</sup> (v0.6.0). FPKM (Fragments Per  
762 Kilobase of transcript per Million fragments mapped) values are calculated using  
763 custom scripts and differential gene expression analysis was performed with the R  
764 Bioconductor package “DESeq2” <sup>92</sup>.

765

766 **Immunoprecipitation analysis**

767 Generated raw files were analyzed using Progenesis Q1 for proteomics (version 4.1,  
768 Nonlinear Dynamics, part of Waters) for label-free quantification as described  
769 previously <sup>93</sup>. Resulting normalized protein abundances were used for calculation of  
770 fold-changes and statistical values.

771 The  $\log_2$  of the normalized protein abundance ratios MS4A15/GFP and  $-\log_{10}$  of  
772 corresponding  $p$ -values of all quantified proteins were visualized in a volcano plot. A  
773 very specific pulldown in the MS4A15-PD samples and very low protein abundances in  
774 the GFP controls lead to the appearance of mainly only one “arm” of the volcano plot.

775

## 776 **Metabolomic analysis**

777 Statistical analysis was performed in R studio (R 1.2.5019). To identify metabolites that  
778 show significant change a Mann-Whitney U test for non-parametric variables was  
779 performed, and BH corrected for multiple testing. Missing values were imputed by  
780 randomly generated minimum values and the data was TIC normalized. Unit variance  
781 scaling and mean centering was applied before statistical testing. PLS-DA models were  
782 built in SIMCA-P (Umetrics) and validated by performing 100 random permutations.

783

## 784 **Heatmap proteomics representation**

785 For heatmap of known ferroptosis genes from Stockwell<sup>1</sup>, individual log<sub>2</sub> samples were  
786 divided by the sum of each row and clustered by Euclidean distance using Gene Cluster  
787 3<sup>94</sup>. The results were mapped with Java Treeview<sup>95</sup>.

788

## 789 **KEGG Calcium clustering**

790 To generate the clustered dataset shown in Fig. 6A and Supplementary Table 4,  
791 CTRP2.0 data were downloaded from CTD2 data-portal<sup>96</sup>. Top 100 resistant/sensitive  
792 cell lines are AUC v20.data.curves\_post\_qc.txt values. CCLE expression data were  
793 downloaded from

794 [https://depmap.org/portal/download/all/?release=DepMap+Public+20Q1&file=CCLE\\_e](https://depmap.org/portal/download/all/?release=DepMap+Public+20Q1&file=CCLE_expression_full.csv)  
795 [xpression\\_full.csv](https://depmap.org/portal/download/all/?release=DepMap+Public+20Q1&file=CCLE_expression_full.csv).

796 KEGG Calcium signaling pathway genes were downloaded from  
797 [https://www.genome.jp/dbget-bin/get\\_linkdb?-t+orthology+path:ko04020](https://www.genome.jp/dbget-bin/get_linkdb?-t+orthology+path:ko04020). After  
798 normalization, Gene Cluster 3.0 with hierarchical clustering for cell lines was used

799 according to Euclidean distance with complete linkage; clustering for genes used City  
800 Block clustering. Data were visualized using Java TreeView.

801

## 802 **Principal component analysis**

803 Gene expression data consists of 204 human cell lines (observations) from two different  
804 known groups (Resistant group (R) and Sensitive group (S)) described by 193 genes  
805 (variables).

806 Principal component analysis (PCA) was performed in R (version 3.6.3) to visualize the  
807 clustering of the gene expression data using log-fold transcript abundance of gene  
808 arrays in each group. Variables were pretreated to eliminate redundant columns with  
809 more than 40 zero values by applying the function implemented in R/colSums (RS ==0).  
810 The following analysis was performed by variables with the highest 100 median  
811 absolute deviations (MAD). Multivariate biplot were performed to characterize the  
812 variability of the data in each group using “ggplot2”<sup>97</sup>, “factoextra”<sup>98</sup>, and “ade4”<sup>99</sup>  
813 packages.

814

## 815 **ssGSEA implementation**

816 The correlations between gene expression levels were calculated by Pearson’s test.  
817 The 50 genes with the most significant correlation coefficients were identified from  
818 whole transcriptome. The heatmap was plotted with R package “pheatmap”<sup>100</sup>.

819 GO\_CALCIIUM\_ION\_TRANSMEMBRANE\_TRANSPORT, KEGG\_CELL\_ADHESION,  
820 and KEGG\_CALCIIUM\_SIGNALING\_PATHWAY term lists were derived from GSEA.  
821 The correlation between each term and gene expression level was calculated by  
822 Pearson’s test and plotted with package “ggplot2”<sup>97</sup>. Briefly, all tumor samples were

823 centered into 40 values by their expression level of *MS4A15*. Each dot represents the  
824 average *MS4A15* expression level of 40 tumor samples. The most significant  
825 correlation between each GO terms and *MS4A15* expression was identified and plotted  
826 with R package “ggplot2”<sup>97</sup>.

827 Lung Adenocarcinoma (LUAD) and solid tumour transcriptome data were downloaded  
828 via the TCGA website. R (version: 3.5.3) was used for these analyses. The enrichment  
829 scores of the terms (GO or KEGG) were evaluated using single-sample gene set  
830 enrichment analysis (ssGSEA) (R package “GSVA”<sup>101</sup>).

831

## 832 **DATA AVAILABILITY**

833 All data for this study are included. Transcriptomics data generated in this study are  
834 available via GEO: GSE160574. Scripts and additional data related to this work will be  
835 available upon request to the lead contact.

836 **CONFLICT OF INTEREST STATEMENT**

837 J.A.S. holds patents related to ferroptosis. The other authors declare no competing interests.

838

839 **ETHICS STATEMENT**

840 This study did not require ethical permission.

841

842 **AUTHOR CONTRIBUTION STATEMENT**

843 Study Initiation, SX, SP, and JAS; Conceptualization, JAS; Methodology, SX, CM, SP, JM-P,  
844 XB, RF, XJ, and JAS; Investigation, SX, CM, SP, JM-P, XB, RF, XJ, SMH, PS-K, and JAS;  
845 Data Analysis, SX, CM, SP, VANK, JM-P, XB, and JAS; Writing – Original Draft, CM, JAS;  
846 Writing – Review & Editing, SX, CM, SP, VANK, and JAS; Funding Acquisition, SX and JAS;  
847 Resources: JAS; Supervision, JAS.

848

849 **FUNDING STATEMENT**

850 This work was supported by Helmholtz Zentrum Munich GmbH (J.A.S.); this research was also  
851 supported by the Chinese Scholarship Council (S.X., 201609505007) and the Innovation  
852 Platform for Academicians of Hainan Province.

853

854 **ACKNOWLEDGEMENTS**

855 The results shown here are in whole or part based upon data generated by the TCGA  
856 Research Network: <https://www.cancer.gov/tcga>. Calu-1 cells, (1S, 3R)-RSL3 (RSL3) and  
857 imidazole ketone erastin (IKE) were kindly provided by Brent Stockwell. We also thank  
858 Brent Stockwell for critical reading of the manuscript. We thank Michelle Vincendeau and  
859 Stefan Schwarzmayer for supporting the RNAseq experiments. Lenti dCAS-VP64\_Blast was  
860 a gift from Feng Zhang. Lenti MS2-P65-HSF1\_Hygro was a gift from Feng Zhang. Lenti  
861 sgRNA(MS2)\_zeo backbone was a gift from Feng Zhang. pLV hU6-sgRNA hUbC-dCas9-  
862 KRAB-T2a-Puro was a gift from Charles Gersbach. pHCMV-EcoEnv was a gift from Miguel  
863 Sena-Esteves. pRSV-Rev was a gift from Didier Trono. pMDLg/pRRE was a gift from Didier  
864 Trono. We thank Daniel Krappmann, Martin Göttlicher, and Kamyar Hadian for gifting cell  
865 lines and materials.

866

867

## REFERENCES

- 868 1. Stockwell BR, Friedmann Angeli JP, Bayir H, Bush AI, Conrad M, Dixon SJ, *et al.*  
869 Ferroptosis: A Regulated Cell Death Nexus Linking Metabolism, Redox Biology, and  
870 Disease. *Cell* 2017, **171**(2): 273-285.
- 871  
872 2. Dixon SJ, Lemberg KM, Lamprecht MR, Skouta R, Zaitsev EM, Gleason CE, *et al.*  
873 Ferroptosis: an iron-dependent form of nonapoptotic cell death. *Cell* 2012, **149**(5):  
874 1060-1072.
- 875  
876 3. Yang WS, SriRamaratnam R, Welsch ME, Shimada K, Skouta R, Viswanathan VS, *et al.*  
877 Regulation of ferroptotic cancer cell death by GPX4. *Cell* 2014, **156**(1-2): 317-331.
- 878  
879 4. Seiler A, Schneider M, Förster H, Roth S, Wirth EK, Culmsee C, *et al.* Glutathione  
880 peroxidase 4 senses and translates oxidative stress into 12/15-lipoxygenase  
881 dependent-and AIF-mediated cell death. *Cell metabolism* 2008, **8**(3): 237-248.
- 882  
883 5. Li Y, Maher P, Schubert D. A role for 12-lipoxygenase in nerve cell death caused by  
884 glutathione depletion. *Neuron* 1997, **19**(2): 453-463.
- 885  
886 6. Lewerenz J, Hewett SJ, Huang Y, Lambros M, Gout PW, Kalivas PW, *et al.* The  
887 cystine/glutamate antiporter system xc<sup>-</sup> in health and disease: from molecular  
888 mechanisms to novel therapeutic opportunities. *Antioxidants & redox signaling* 2013,  
889 **18**(5): 522-555.
- 890  
891 7. Emerit J, Edeas M, Bricaire F. Neurodegenerative diseases and oxidative stress.  
892 *Biomedicine & pharmacotherapy* 2004, **58**(1): 39-46.
- 893  
894 8. Orrenius S, Gogvadze V, Zhivotovsky B. Calcium and mitochondria in the regulation of  
895 cell death. *Biochemical and biophysical research communications* 2015, **460**(1): 72-81.
- 896  
897 9. Roderick HL, Cook SJ. Ca<sup>2+</sup> signalling checkpoints in cancer: remodelling Ca<sup>2+</sup> for  
898 cancer cell proliferation and survival. *Nat Rev Cancer* 2008, **8**(5): 361-375.
- 899  
900 10. Zhai M, Yang D, Yi W, Sun W. Involvement of calcium channels in the regulation of  
901 adipogenesis. *Adipocyte* 2020, **9**(1): 132-141.
- 902  
903 11. Arruda AP, Hotamisligil GS. Calcium Homeostasis and Organelle Function in the  
904 Pathogenesis of Obesity and Diabetes. *Cell metabolism* 2015, **22**(3): 381-397.
- 905  
906 12. Jones BH, Kim JH, Zemel MB, Woychik RP, Michaud EJ, Wilkison WO, *et al.*  
907 Upregulation of adipocyte metabolism by agouti protein: possible paracrine actions in  
908 yellow mouse obesity. *American Journal of Physiology-Endocrinology and Metabolism*  
909 1996, **270**(1): E192-E196.

- 910  
911 13. Xue B, Moustaid N, Wilkison WO, Zemel MB. The agouti gene product inhibits lipolysis  
912 in human adipocytes via a Ca<sup>2+</sup>-dependent mechanism. *Faseb j* 1998, **12**(13): 1391-  
913 1396.
- 914  
915 14. Ye R, Ni M, Wang M, Luo S, Zhu G, Chow RH, *et al.* Inositol 1,4,5-trisphosphate  
916 receptor 1 mutation perturbs glucose homeostasis and enhances susceptibility to diet-  
917 induced diabetes. *J Endocrinol* 2011, **210**(2): 209-217.
- 918  
919 15. Subramanian M, Metya SK, Sadaf S, Kumar S, Schwudke D, Hasan GJDM, *et al.*  
920 Altered lipid homeostasis in *Drosophila* InsP3 receptor mutants leads to obesity and  
921 hyperphagia. 2013, **6**(3): 734-744.
- 922  
923 16. Ntambi JM, Takova TJD. Role of Ca<sup>2+</sup> in the early stages of murine adipocyte  
924 differentiation as evidenced by calcium mobilizing agents. 1996, **60**(3): 151-158.
- 925  
926 17. Shi H, HALVORSEN Y-D, ELLIS PN, WILKISON WO, ZEMEL MBJPg. Role of  
927 intracellular calcium in human adipocyte differentiation. 2000, **3**(2): 75-82.
- 928  
929 18. Bi J, Wang W, Liu Z, Huang X, Jiang Q, Liu G, *et al.* Seipin promotes adipose tissue  
930 fat storage through the ER Ca<sup>2+</sup>-ATPase SERCA. 2014, **19**(5): 861-871.
- 931  
932 19. Lewerenz J, Ates G, Methner A, Conrad M, Maher P. Oxytosis/Ferroptosis-(Re-)  
933 Emerging Roles for Oxidative Stress-Dependent Non-apoptotic Cell Death in Diseases  
934 of the Central Nervous System. *Frontiers in neuroscience* 2018, **12**: 214.
- 935  
936 20. Maher P, van Leyen K, Dey PN, Honrath B, Dolga A, Methner A. The role of Ca<sup>2+</sup> in  
937 cell death caused by oxidative glutamate toxicity and ferroptosis. *Cell calcium* 2018,  
938 **70**: 47-55.
- 939  
940 21. Lane J, Mansel RE, Jiang WG. Expression of human delta-6-desaturase is associated  
941 with aggressiveness of human breast cancer. *International journal of molecular*  
942 *medicine* 2003, **12**(2): 253-257.
- 943  
944 22. Azrad M, Turgeon C, Demark-Wahnefried W. Current evidence linking polyunsaturated  
945 Fatty acids with cancer risk and progression. *Frontiers in oncology* 2013, **3**: 224-224.
- 946  
947 23. Yan G, Li L, Zhu B, Li Y. Lipidome in colorectal cancer. *Oncotarget* 2016, **7**(22).
- 948  
949 24. Hilvo M, Denkert C, Lehtinen L, Müller B, Brockmöller S, Seppänen-Laakso T, *et al.*  
950 Novel theranostic opportunities offered by characterization of altered membrane lipid  
951 metabolism in breast cancer progression. *Cancer research* 2011, **71**(9): 3236-3245.
- 952

- 953 25. Peck B, Schulze A. Lipid desaturation—the next step in targeting lipogenesis in cancer?  
954 *The FEBS journal* 2016, **283**(15): 2767-2778.
- 955  
956 26. Rysman E, Brusselmans K, Scheys K, Timmermans L, Derua R, Munck S, *et al.* De  
957 novo lipogenesis protects cancer cells from free radicals and chemotherapeutics by  
958 promoting membrane lipid saturation. *Cancer research* 2010, **70**(20): 8117-8126.
- 959  
960 27. Ishibashi K, Suzuki M, Sasaki S, Imai MJG. Identification of a new multigene four-  
961 transmembrane family (MS4A) related to CD20, HTm4 and  $\beta$  subunit of the high-affinity  
962 IgE receptor. 2001, **264**(1): 87-93.
- 963  
964 28. Cruse G, Kaur D, Leyland M, Bradding PJTFJ. A novel Fc $\epsilon$ RI $\beta$ -chain truncation  
965 regulates human mast cell proliferation and survival. 2010, **24**(10): 4047-4057.
- 966  
967 29. Deans JP, Li H, Polyak MJ. CD20-mediated apoptosis: signalling through lipid rafts.  
968 *Immunology* 2002, **107**(2): 176-182.
- 969  
970 30. Koslowski M, Sahin U, Dhaene K, Huber C, Tureci O. MS4A12 is a colon-selective  
971 store-operated calcium channel promoting malignant cell processes. *Cancer research*  
972 2008, **68**(9): 3458-3466.
- 973  
974 31. Shan D, Ledbetter JA, Press OW. Signaling events involved in anti-CD20-induced  
975 apoptosis of malignant human B cells. *Cancer immunology, immunotherapy* 2000,  
976 **48**(12): 673-683.
- 977  
978 32. Kraft VA, Bezjian CT, Pfeiffer S, Ringelstetter L, Müller C, Zandkarimi F, *et al.* GTP  
979 Cyclohydrolase 1/Tetrahydrobiopterin Counteract Ferroptosis through Lipid  
980 Remodeling. *ACS Central Science* 2019.
- 981  
982 33. Seiler A, Schneider M, Förster H, Roth S, Wirth EK, Culmsee C, *et al.* Glutathione  
983 peroxidase 4 senses and translates oxidative stress into 12/15-lipoxygenase  
984 dependent- and AIF-mediated cell death. *Cell metabolism* 2008, **8**(3): 237-248.
- 985  
986 34. Bannai S, Tsukeda H, Okumura H. Effect of antioxidants on cultured human diploid  
987 fibroblasts exposed to cystine-free medium. *Biochemical and biophysical research*  
988 *communications* 1977, **74**(4): 1582-1588.
- 989  
990 35. Cao JY, Dixon SJ. Mechanisms of ferroptosis. *Cell Mol Life Sci* 2016, **73**(11-12): 2195-  
991 2209.
- 992  
993 36. Uhlen M, Zhang C, Lee S, Sjostedt E, Fagerberg L, Bidkhorji G, *et al.* A pathology atlas  
994 of the human cancer transcriptome. *Science (New York, NY)* 2017, **357**(6352).
- 995



- 996 37. Ghandi M, Huang FW, Jané-Valbuena J, Kryukov GV, Lo CC, McDonald ER, *et al.*  
997 Next-generation characterization of the Cancer Cell Line Encyclopedia. *Nature* 2019,  
998 **569**(7757): 503-508.
- 999  
1000 38. <http://ds.biogps.org/?dataset=GSE1133&gene=219995> G-MA. June 21, 2021.
- 1001  
1002 39. Arhatte M, Gunaratne GS, El Boustany C, Kuo IY, Moro C, Duprat F, *et al.* TMEM33  
1003 regulates intracellular calcium homeostasis in renal tubular epithelial cells. *Nature*  
1004 *communications* 2019, **10**(1): 2024.
- 1005  
1006 40. Savage AM, Kurusamy S, Chen Y, Jiang Z, Chhabria K, MacDonald RB, *et al.* tmem33  
1007 is essential for VEGF-mediated endothelial calcium oscillations and angiogenesis.  
1008 *Nature communications* 2019, **10**(1): 732.
- 1009  
1010 41. Collisson EA, Campbell JD, Brooks AN, Berger AH, Lee W, Chmielecki J, *et al.*  
1011 Comprehensive molecular profiling of lung adenocarcinoma. *Nature* 2014, **511**(7511):  
1012 543-550.
- 1013  
1014 42. Poursaitidis I, Wang X, Crighton T, Labuschagne C, Mason D, Cramer SL, *et al.*  
1015 Oncogene-selective sensitivity to synchronous cell death following modulation of the  
1016 amino acid nutrient cystine. *Cell reports* 2017, **18**(11): 2547-2556.
- 1017  
1018 43. Yagoda N, von Rechenberg M, Zaganjor E, Bauer AJ, Yang WS, Fridman DJ, *et al.*  
1019 RAS–RAF–MEK-dependent oxidative cell death involving voltage-dependent anion  
1020 channels. *Nature* 2007, **447**(7146): 865-869.
- 1021  
1022 44. Ron D, Walter P. Signal integration in the endoplasmic reticulum unfolded protein  
1023 response. *Nature reviews Molecular cell biology* 2007, **8**(7): 519-529.
- 1024  
1025 45. Witting M, Schmitt-Kopplin P. The *Caenorhabditis elegans* lipidome: A primer for lipid  
1026 analysis in *Caenorhabditis elegans*. *Arch Biochem Biophys* 2016, **589**: 27-37.
- 1027  
1028 46. Magtanong L, Ko P-J, To M, Cao JY, Forcina GC, Tarangelo A, *et al.* Exogenous  
1029 Monounsaturated Fatty Acids Promote a Ferroptosis-Resistant Cell State. *Cell*  
1030 *Chemical Biology* 2019, **26**(3): 420-432.e429.
- 1031  
1032 47. Kagan VE, Mao G, Qu F, Angeli JP, Doll S, Croix CS, *et al.* Oxidized arachidonic and  
1033 adrenic PEs navigate cells to ferroptosis. *Nat Chem Biol* 2017, **13**(1): 81-90.
- 1034  
1035 48. Zou Y, Henry WS, Ricq EL, Graham ET, Phadnis VV, Maretich P, *et al.* Plasticity of  
1036 ether lipids promotes ferroptosis susceptibility and evasion. *Nature* 2020.
- 1037

- 1038 49. Rees MG, Seashore-Ludlow B, Cheah JH, Adams DJ, Price EV, Gill S, *et al.* Correlating  
1039 chemical sensitivity and basal gene expression reveals mechanism of action. *Nat*  
1040 *Chem Biol* 2016, **12**(2): 109-116.
- 1041  
1042 50. Vriens K, Christen S, Parik S, Broekaert D, Yoshinaga K, Talebi A, *et al.* Evidence for  
1043 an alternative fatty acid desaturation pathway increasing cancer plasticity. *Nature* 2019,  
1044 **566**(7744): 403-406.
- 1045  
1046 51. Sahin AO, Buitenhuis M. Molecular mechanisms underlying adhesion and migration of  
1047 hematopoietic stem cells. *Cell Adh Migr* 2012, **6**(1): 39-48.
- 1048  
1049 52. Viswanathan VS, Ryan MJ, Dhruv HD, Gill S, Eichhoff OM, Seashore-Ludlow B, *et al.*  
1050 Dependency of a therapy-resistant state of cancer cells on a lipid peroxidase pathway.  
1051 *Nature* 2017, **547**: 453.
- 1052  
1053 53. Meyers RM, Bryan JG, McFarland JM, Weir BA, Sizemore AE, Xu H, *et al.*  
1054 Computational correction of copy number effect improves specificity of CRISPR–Cas9  
1055 essentiality screens in cancer cells. *Nature Genetics* 2017, **49**(12): 1779-1784.
- 1056  
1057 54. Rougé L, Chiang N, Steffek M, Kugel C, Croll TI, Tam C, *et al.* Structure of CD20 in  
1058 complex with the therapeutic monoclonal antibody rituximab. *Science (New York, NY)*  
1059 2020: eaaz9356.
- 1060  
1061 55. Eon Kuek L, Leffler M, Mackay GA, Hulett MD. The MS4A family: counting past 1, 2  
1062 and 3. *Immunology and cell biology* 2016, **94**(1): 11-23.
- 1063  
1064 56. Polyak MJ, Li H, Shariat N, Deans JP. CD20 homo-oligomers physically associate with  
1065 the B cell antigen receptor. Dissociation upon receptor engagement and recruitment of  
1066 phosphoproteins and calmodulin-binding proteins. *The Journal of biological chemistry*  
1067 2008, **283**(27): 18545-18552.
- 1068  
1069 57. Magtanong L, Ko P-J, To M, Cao JY, Forcina GC, Tarangelo A, *et al.* Exogenous  
1070 monounsaturated fatty acids promote a ferroptosis-resistant cell state. *Cell chemical*  
1071 *biology* 2019, **26**(3): 420-432. e429.
- 1072  
1073 58. Perez MA, Magtanong L, Dixon SJ, Watts JL. Dietary Lipids Induce Ferroptosis in  
1074 *Caenorhabditis elegans* and Human Cancer Cells. *Developmental Cell* 2020, **54**(4):  
1075 447-454.e444.
- 1076  
1077 59. Gorgas K, Teigler A, Komljenovic D, Just WW. The ether lipid-deficient mouse:  
1078 Tracking down plasmalogen functions. *Biochimica et Biophysica Acta (BBA) -*  
1079 *Molecular Cell Research* 2006, **1763**(12): 1511-1526.
- 1080  
1081 60. Brites P, Waterham HR, Wanders RJ. Functions and biosynthesis of plasmalogens in  
1082 health and disease. *Biochimica et biophysica acta* 2004, **1636**(2-3): 219-231.

- 1083  
1084 61. Reiss D, Beyer K, Engelmann B. Delayed oxidative degradation of polyunsaturated  
1085 diacyl phospholipids in the presence of plasmalogen phospholipids in vitro. *Biochemical*  
1086 *Journal* 1997, **323**(3): 807-814.
- 1087  
1088 62. Broniec A, Klosinski R, Pawlak A, Wrona-Krol M, Thompson D, Sarna T. Interactions  
1089 of plasmalogens and their diacyl analogs with singlet oxygen in selected model  
1090 systems. *Free Radical Biology and Medicine* 2011, **50**(7): 892-898.
- 1091  
1092 63. Messias MCF, Mecatti GC, Priolli DG, de Oliveira Carvalho P. Plasmalogen lipids:  
1093 functional mechanism and their involvement in gastrointestinal cancer. *Lipids Health*  
1094 *Dis* 2018, **17**(1): 41.
- 1095  
1096 64. Huang YS, McAdoo KR, Mitchell J, Horrobin DF. Effects of calcium deprivation on n-6  
1097 fatty acid metabolism in growing rats. *Biochemical medicine and metabolic biology*  
1098 1988, **40**(1): 61-67.
- 1099  
1100 65. Bai Y, Meng L, Han L, Jia Y, Zhao Y, Gao H, *et al.* Lipid storage and lipophagy regulates  
1101 ferroptosis. *Biochemical and biophysical research communications* 2019, **508**(4): 997-  
1102 1003.
- 1103  
1104 66. Bailey AP, Koster G, Guillermier C, Hirst EM, MacRae JI, Lechene CP, *et al.* Antioxidant  
1105 Role for Lipid Droplets in a Stem Cell Niche of *Drosophila*. *Cell* 2015, **163**(2): 340-353.
- 1106  
1107 67. Olzmann JA, Carvalho P. Dynamics and functions of lipid droplets. *Nature reviews*  
1108 *Molecular cell biology* 2019, **20**(3): 137-155.
- 1109  
1110 68. Li D, Li Y. The interaction between ferroptosis and lipid metabolism in cancer. *Signal*  
1111 *Transduct Target Ther* 2020, **5**(1): 108.
- 1112  
1113 69. Bittremieux M, Parys JB, Pinton P, Bultynck G. ER functions of oncogenes and tumor  
1114 suppressors: Modulators of intracellular Ca<sup>2+</sup> signaling. *Biochimica et biophysica*  
1115 *acta* 2016, **1863**(6 Pt B): 1364-1378.
- 1116  
1117 70. Cui C, Merritt R, Fu L, Pan Z. Targeting calcium signaling in cancer therapy. *Acta*  
1118 *pharmaceutica sinica B* 2017, **7**(1): 3-17.
- 1119  
1120 71. Kania E, Roest G, Vervliet T, Parys JB, Bultynck G. IP3 Receptor-Mediated Calcium  
1121 Signaling and Its Role in Autophagy in Cancer. *Frontiers in Oncology* 2017, **7**(140).
- 1122  
1123 72. Pierro C, Cook SJ, Foets TC, Bootman MD, Roderick HL. Oncogenic K-Ras  
1124 suppresses IP3-dependent Ca<sup>2+</sup> release through remodelling of the isoform  
1125 composition of IP3Rs and ER luminal Ca<sup>2+</sup> levels in colorectal cancer cell lines. *Journal*  
1126 *of cell science* 2014, **127**(7): 1607-1619.

- 1127  
1128 73. Hakii H, Fujiki H, Suganuma M, Nakayasu M, Tahira T, Sugimura T, *et al.* Thapsigargin,  
1129 a histamine secretagogue, is a non-12-O-tetradecanolphorbol-13-acetate (TPA) type  
1130 tumor promoter in two-stage mouse skin carcinogenesis. *Journal of Cancer Research*  
1131 *and Clinical Oncology* 1986, **111**(3): 177-181.
- 1132  
1133 74. Liu LH, Boivin GP, Prasad V, Periasamy M, Shull GE. Squamous cell tumors in mice  
1134 heterozygous for a null allele of *Atp2a2*, encoding the sarco(endo)plasmic reticulum  
1135  $\text{Ca}^{2+}$ -ATPase isoform 2  $\text{Ca}^{2+}$  pump. *The Journal of biological chemistry* 2001,  
1136 **276**(29): 26737-26740.
- 1137  
1138 75. Doll S, Freitas FP, Shah R, Aldrovandi M, da Silva MC, Ingold I, *et al.* FSP1 is a  
1139 glutathione-independent ferroptosis suppressor. *Nature* 2019, **575**(7784): 693-698.
- 1140  
1141 76. Bersuker K, Hendricks JM, Li Z, Magtanong L, Ford B, Tang PH, *et al.* The CoQ  
1142 oxidoreductase FSP1 acts parallel to GPX4 to inhibit ferroptosis. *Nature* 2019,  
1143 **575**(7784): 688-692.
- 1144  
1145 77. Doll S, Proneth B, Tyurina YY, Panzilius E, Kobayashi S, Ingold I, *et al.* ACSL4 dictates  
1146 ferroptosis sensitivity by shaping cellular lipid composition. *Nat Chem Biol* 2017, **13**(1):  
1147 91-98.
- 1148  
1149 78. Konermann S, Brigham MD, Trevino AE, Joung J, Abudayyeh OO, Barcena C, *et al.*  
1150 Genome-scale transcriptional activation by an engineered CRISPR-Cas9 complex.  
1151 *Nature* 2015, **517**(7536): 583-588.
- 1152  
1153 79. Konermann S, Brigham MD, Trevino AE, Joung J, Abudayyeh OO, Barcena C, *et al.*  
1154 Genome-scale transcriptional activation by an engineered CRISPR-Cas9 complex.  
1155 2015, **517**(7536): 583-588.
- 1156  
1157 80. Haack TB, Kopajtich R, Freisinger P, Wieland T, Rorbach J, Nicholls TJ, *et al.* ELAC2  
1158 mutations cause a mitochondrial RNA processing defect associated with hypertrophic  
1159 cardiomyopathy. *The American Journal of Human Genetics* 2013, **93**(2): 211-223.
- 1160  
1161 81. Wiśniewski JR, Zougman A, Nagaraj N, Mann M. Universal sample preparation method  
1162 for proteome analysis. *Nature methods* 2009, **6**(5): 359-362.
- 1163  
1164 82. Bruderer R, Bernhardt OM, Gandhi T, Miladinović SM, Cheng L-Y, Messner S, *et al.*  
1165 Extending the limits of quantitative proteome profiling with data-independent acquisition  
1166 and application to acetaminophen-treated three-dimensional liver microtissues.  
1167 *Molecular & Cellular Proteomics* 2015, **14**(5): 1400-1410.
- 1168  
1169 83. Muller C, Dietz I, Tziotis D, Moritz F, Rupp J, Schmitt-Kopplin P. Molecular cartography  
1170 in acute *Chlamydia pneumoniae* infections--a non-targeted metabolomics approach.  
1171 *Analytical and bioanalytical chemistry* 2013, **405**(15): 5119-5131.

- 1172  
1173 84. Sud M, Fahy E, Cotter D, Brown A, Dennis EA, Glass CK, *et al.* LMSD: LIPID MAPS  
1174 structure database. *Nucleic Acids Res* 2007, **35**(Database issue): D527-532.
- 1175  
1176 85. Burke MC, Mirokhin YA, Tchekhovskoi DV, Markey SP, Heidbrink Thompson J, Larkin  
1177 C, *et al.* The Hybrid Search: A Mass Spectral Library Search Method for Discovery of  
1178 Modifications in Proteomics. *Journal of Proteome Research* 2017, **16**(5): 1924-1935.
- 1179  
1180 86. Ruttkies C, Schymanski EL, Wolf S, Hollender J, Neumann S. MetFrag relaunched:  
1181 incorporating strategies beyond in silico fragmentation. *Journal of Cheminformatics*  
1182 2016, **8**(1): 3.
- 1183  
1184 87. Kerwin JL, Tuininga AR, Ericsson LH. Identification of molecular species of  
1185 glycerophospholipids and sphingomyelin using electrospray mass spectrometry. *J Lipid*  
1186 *Res* 1994, **35**(6): 1102-1114.
- 1187  
1188 88. Murphy EJ, Stephens R, Jurkowitz-Alexander M, Horrocks LA. Acidic hydrolysis of  
1189 plasmalogens followed by high-performance liquid chromatography. *Lipids* 1993,  
1190 **28**(6): 565-568.
- 1191  
1192 89. Boncompain G, Muller C, Meas-Yedid V, Schmitt-Kopplin P, Lazarow PB, Subtil A. The  
1193 intracellular bacteria *Chlamydia* hijack peroxisomes and utilize their enzymatic capacity  
1194 to produce bacteria-specific phospholipids. *PLoS One* 2014, **9**(1): e86196.
- 1195  
1196 90. Dobin A, Davis CA, Schlesinger F, Drenkow J, Zaleski C, Jha S, *et al.* STAR: ultrafast  
1197 universal RNA-seq aligner. *Bioinformatics* 2013, **29**(1): 15-21.
- 1198  
1199 91. Anders S, Pyl PT, Huber W. HTSeq—a Python framework to work with high-throughput  
1200 sequencing data. *Bioinformatics* 2015, **31**(2): 166-169.
- 1201  
1202 92. Love MI, Huber W, Anders S. Moderated estimation of fold change and dispersion for  
1203 RNA-seq data with DESeq2. *Genome biology* 2014, **15**(12): 550.
- 1204  
1205 93. Hauck SM, Dietter J, Kramer RL, Hofmaier F, Zipplies JK, Amann B, *et al.* Deciphering  
1206 membrane-associated molecular processes in target tissue of autoimmune uveitis by  
1207 label-free quantitative mass spectrometry. 2010, **9**(10): 2292-2305.
- 1208  
1209 94. de Hoon MJL, Imoto S, Nolan J, Miyano S. Open source clustering software.  
1210 *Bioinformatics* 2004, **20**(9): 1453-1454.
- 1211  
1212 95. Saldanha AJ. Java Treeview—extensible visualization of microarray data.  
1213 *Bioinformatics* 2004, **20**(17): 3246-3248.
- 1214

- 1215 96. Basu A, Bodycombe NE, Cheah JH, Price EV, Liu K, Schaefer GI, *et al.* An interactive  
1216 resource to identify cancer genetic and lineage dependencies targeted by small  
1217 molecules. *Cell* 2013, **154**(5): 1151-1161.
- 1218  
1219 97. Wickham H. *ggplot2: elegant graphics for data analysis*. Springer, 2016.
- 1220  
1221 98. Kassambara A, Mundt F. Package 'factoextra'. *Extract and visualize the results of*  
1222 *multivariate data analyses* 2017, **76**.
- 1223  
1224 99. Dray S, Dufour A-B. The ade4 package: implementing the duality diagram for  
1225 ecologists. *Journal of statistical software* 2007, **22**(4): 1-20.
- 1226  
1227 100. Kolde R, Kolde MR. Package 'pheatmap'. *R Package* 2015, **1**(7).
- 1228  
1229 101. Hänzelmann S, Castelo R, Guinney J. GSVA: gene set variation analysis for microarray  
1230 and RNA-seq data. *BMC bioinformatics* 2013, **14**(1): 7.
- 1231  
1232  
1233

1234 **MAIN FIGURE TITLES AND LEGENDS**

1235

1236 **Fig. 1. MS4A15 specifically protects cells against ferroptosis**

1237 **A** Dose response curve of *Ms4a15*-overexpressing immortalized mouse fibroblasts  
1238 (*Ms4a15* OE) compared to empty vector control cells (control) against RSL3 treatment  
1239 (16 h). Viability was detected by percent Resazurin conversion relative to respective  
1240 untreated cells. Addition of 10  $\mu$ M  $\alpha$ -tocopherol ( $\alpha$ Toc) serves as rescue control for  
1241 ferroptosis. Inset shows relative *Ms4a15* expression by qPCR (rel. mRNA). cT values  
1242 are 31.1 and 27.4 for control and *Ms4a15* OE, respectively.

1243 **B** Survival of *Ms4a15* OE cells compared to control against ferroptosis inducers: 2  $\mu$ M  
1244 IKE (16 h), *Gpx4*<sup>-/-</sup> (72 h) by 1  $\mu$ M 4-hydroxy-tamoxifen induction and 10  $\mu$ M FIN56  
1245 with 10  $\mu$ M  $\alpha$ Toc rescue. Significance was evaluated by two-tailed t-test.

1246 **C** Lipid peroxidation induced by RSL3 (0.3  $\mu$ M) treatment for 3 h in *Ms4a15* OE and  
1247 control cells measured by BODIPY 581/591 C11 stain (BODIPY-C11). A typical FACS  
1248 histogram of three independent experiments is depicted.

1249 **D** Brightfield and propidium iodide images and quantification (PI%) of *Ms4a15* OE cells  
1250 compared to control following 16 h RSL3 (0.5  $\mu$ M) challenge (left). PI values at this  
1251 timepoint likely underestimate cell death due to cell detachment, as observed in phase  
1252 contrast images. (Right) Clonogenic survival at 7 d following 16 h RSL3 (1.25  $\mu$ M)  
1253 treatment in a colony-forming assay.

1254 **E** 3D-spheroids of *Ms4a15* OE and control cells grown for 4 d and treated with 2 $\mu$ M  
1255 RSL3 for 16 h before PI staining. Relative (rel.) PI intensity was calculated versus  
1256 untreated spheroids ( $n = 4$ ).

1257 **F** Viability of human HT1080 (**D**) and Calu-1 (**E**) *MS4A15*-overexpressing cells ( $\pm$ FLAG)  
1258 challenged with IKE compared to empty control. Insets show *MS4A15* expression by  
1259 qPCR or Western.

1260 **G** mRNA expression level of *MS4A15* in 1375 CCLE cancer cell lines compared with  
1261 *GAPDH*.

1262 Relative mRNA expression is shown as mean  $\pm$  SD of  $n = 3$  technical replicates of three  
1263 independent experimental repetitions. Viability data are plotted as representative  
1264 mean  $\pm$  SD of  $n = 3$  technical replicates for independent experiments repeated at least  
1265 three times with similar outcomes. Curve statistics,  $p$ -values of two-way ANOVA, are  
1266 shown for comparisons. \* $P < 0.05$ , \*\* $P < 0.01$ , \*\*\* $P < 0.001$ , \*\*\*\* $P < 0.0001$ .

1267

1268 **Fig. 2. MS4A15 regulates calcium-mediated ferroptosis**

1269 **A** Enrichment of *MS4A15*-FLAG co-immunoprecipitated proteins in HEK293T cells as  
1270 determined by label-free proteomic quantification. Mean abundance ratios were

1271 calculated compared to GFP-expressing cells incubated with anti-FLAG as a control.  
1272 Dotted horizontal line indicates significance (paired t-test,  $p < 0.05$ ).

1273 **B** Single sample Gene Set Enrichment Analysis (GSEA) correlation analysis in primary  
1274 lung tumors between *MS4A15* and  $\text{Ca}^{2+}$  transmembrane transporters (RSEM, RNA-  
1275 Seq by Expectation-Maximization). Significance was evaluated by Pearson correlation.

1276 **C** Western blot of  $\text{IP}_3\text{R1}$  protein in *Ms4a15* OE and control cells. Vinculin is given as  
1277 loading control.

1278 **D** Schematic of calcium related processes in (**E-G**). Activation of G protein-coupled  
1279 receptors (GPCRs) such as Bradykinin receptor stimulates phospholipase C (PLC)  
1280 cleavage of phosphatidylinositol 4,5-bisphosphate ( $\text{PIP}_2$ ) to yield  $\text{IP}_3$ , triggering  $\text{Ca}^{2+}$   
1281 release from the endoplasmic reticulum (ER). Thapsigargin (Tgn) blocks SERCA-  
1282 mediated ER  $\text{Ca}^{2+}$  uptake, while ionophore catalyzes nonspecific store release in  $\text{Ca}^{2+}$   
1283 free medium. Membrane channels mediate uptake following re-addition of  $\text{CaCl}_2$ -  
1284 containing medium.

1285 **E** Calcium levels detected by cytosolic sensor GCaMP6s using flow cytometry  
1286 (normalized fluorescence, ex488/em530 nm). Top panels: ER  $\text{Ca}^{2+}$  release mediated  
1287 by 50 nM Bradykinin ( $\Delta$ ) or 5  $\mu\text{M}$  Ionophore ( $\wedge$ ) in *Ms4a15* OE compared to control cells  
1288 in  $\text{Ca}^{2+}$ -free buffer. Bottom panels: control cells pre-treated with 50 nM Tgn for 3 h.  
1289 Addition of 2 mM  $\text{CaCl}_2$  ( $\blacktriangle$ ). Data shown are representative results of three  
1290 independent repetitions performed in triplicate with similar outcomes. Fluorescent  
1291 images were acquired 30 s following Bradykinin stimulation for respective genotypes.

1292 **F** Time-dependent (0h - 14 days) effect of Tgn pre-treatment on lipid peroxidation  
1293 detected by BODIPY-C11 induced by RSL3 (0.3  $\mu\text{M}$  for 3 h) in control cells (left panels)  
1294 compared to DMSO. A typical FACS histogram of three independent repetitions is  
1295 depicted. Viability of control cells pre-treated with 2.5 nM Tgn for 7 days or 14 days  
1296 prior to RSL3 induction (untreated, 0 days). Fluorescent images were acquired 30 s  
1297 following Bradykinin stimulation for 14 d treated cells.

1298 **G** Dose-dependent sensitization of *Ms4a15* OE cells to RSL3 by overexpressing  
1299 *Serca2* (*Ms4a15* OE + *Serca2* OE) or empty virus control (*Ms4a15* OE + control) in  
1300 *Ms4a15* OE cells (left panel). Restoration of  $\text{Ca}^{2+}$  dynamics is indicated by Bradykinin  
1301 (right panels). Insets show SERCA2 expression by Western and viability (PI%)  
1302 measurements in respective cell lines.

1303 Viability data are representative mean  $\pm$  SD of  $n = 4$  (**F**) or  $n = 3$  (**G**) replicates for  
1304 experiments repeated independently at least three times. Curve  $p$ -values of two-way  
1305 ANOVA comparisons are shown. \* $P < 0.05$ , \*\* $P < 0.01$ , \*\*\* $P < 0.001$ , \*\*\*\* $P < 0.0001$ .

1306

### 1307 **Fig. 3. Lipid dysregulation in *Ms4a15* OE cells**

1308 Global lipidomics analysis of *Ms4a15* OE, control cells treated with Tgn<sup>short</sup> (3 h), control  
1309 cells treated with Tgn<sup>long</sup> (16 h), and untreated control cells.



1310 **A** Dendrogram indicating separation of untreated *Ms4a15* OE and Tgn<sup>long</sup> treated  
1311 control cells from untreated and Tgn<sup>short</sup> treated control cells by hierarchical cluster  
1312 analysis. Similarly regulated lipid species from *Ms4a15* OE and Tgn<sup>long</sup> were extracted  
1313 and plotted in the heatmap.

1314 **B** Lipid abundance heatmap showing z-score profiles of species similarly  
1315 downregulated in both *Ms4a15* OE and Tgn<sup>long</sup> (group I), exclusively upregulated in  
1316 *Ms4a15* OE (group II), and similarly upregulated in *Ms4a15* OE and Tgn<sup>long</sup> (group III).  
1317 Sample colors correspond to 3a. ( $n = 3$ , Wilcoxon-Mann-Whitney-Test, BH corrected).

1318 **C** Modulated lipid classes in groups I-III by LIPID MAPS Structure Database. GP,  
1319 glycerophospholipid; FA, fatty acid; ST, sterol Lipid; SP, sphingolipid; GL, glycerolipid.  
1320 Ether GPs and ester GPs are in dark colors.

1321 **D** Free fatty acid fold change in *Ms4a15* OE and Tgn<sup>long</sup> compared to untreated control.  
1322 SFAs, saturated fatty acids; MUFAs, monounsaturated fatty acids; PUFAs,  
1323 polyunsaturated fatty acids. Significant  $p$ -values of two-way t-test comparisons versus  
1324 control are shown.

1325 **E** Kendrick plot of significantly modulated diacylglycerophospho-ethanolamine (PE)  
1326 and -choline (PC) ester phospholipids. All species have a referenced Kendrick mass-  
1327 defect (RKMD) value of 0 (saturated chains) or a negative integer (number of  
1328 unsaturated bonds). Dot sizes indicate absolute values of  $\log_2(\text{mean } Ms4a15 \text{ OE}/\text{mean}$   
1329 control) ( $n = 3$ ).  $p < 0.05$ , Wilcoxon-Mann-Whitney-Test, BH corrected).

1330 **F** Model structures of diacyl (esters), plasmanyl (ethers) and plasmenyl (vinyl-ethers).  
1331 The latter are also termed plasmalogens.

1332 **G** Kendrick plot of significantly modulated ether GPs (PE and PC). Dot sizes indicate  
1333 summed peak intensity. For given species isomeric plasmalogens are validated by  
1334 acidic hydrolysis (see Supplementary Table 2) and (H). 'PC e' or 'PE e' represent the  
1335 respective ether species of PC or PE,  $n = 3$ ,  $p < 0.05$ , Wilcoxon-Mann-Whitney-Test,  
1336 BH corrected).

1337 **H** Acidic hydrolysis abundance illustrated for one ester (top), one alkyl-ether (middle)  
1338 and one vinyl-ether GP (bottom).

1339 **I** Summed intensities for all detected GP show a slight reduction of ester GPs as well  
1340 as enrichment in ether GP for *Ms4a15* OE and Tgn<sup>long</sup>. Data shown represent  
1341 mean  $\pm$  SD of  $n = 3$  technical replicates.

1342

1343 **Fig. 4. *Ms4a15* OE defines MUFA-lipids and -plasmalogens as ferroptosis**  
1344 **targets**

1345 **A** Targets of lipid peroxidation are affected by RSL3 treatment (3 h) in control and  
1346 *Ms4a15* OE cells. 'LPE' indicates lyso-form of PE.

1347 **B** PCA scores plot for positive (ESI+) and negative (ESI-) electrospray ionization mode  
1348 indicating the global lipid profile in *Ms4a15* OE and control cells under untreated or  
1349 RSL3 treatment conditions. PCAs were based on 924 annotated PL, GL and FA primary  
1350 affected lipid classes in ferroptosis.

1351 **C** Significantly increased lipids in *Ms4a15* OE are affected by 3 h RSL3 treatment of  
1352 *Ms4a15* OE. Volcano plot of  $\log_2(\text{fold change})$  following RSL3 treatment. Larger dots  
1353 are significant ( $p < 0.05$ ,  $n = 3$ , two-sided Welch test) for changes due to RSL3.

1354 **D-F** Significantly modulated lipids in *Ms4a15* OE compared to control, ranked by  
1355 abundance. Summed peak area of all samples (**Fig. 4A**) is shown in (**D**). (**E**) Fold  
1356 change of these species in *Ms4a15* OE compared to control cells, under untreated  
1357 conditions. (**F**) Fold change of these species in *Ms4a15* OE and control cells upon 3 h  
1358 RSL3 treatment.

1359 **G-I** Significantly modulated lipids in *Ms4a15* OE compared to control, ranked by RSL3  
1360 effect. Summed peak area of all samples (**Fig. 4A**) is shown (**G**). (**H**) Fold change of  
1361 these species in *Ms4a15* OE compared to control cells, under untreated conditions. (**I**)  
1362 Fold change of these species in *Ms4a15* OE and control cells upon 3 h RSL3 treatment.  
1363 Data shown represent mean of  $n = 3$  technical replicates.

1364

1365 **Fig. 5. Distinct activities of MUFA- and PUFA-containing plasmalogens and**  
1366 **lipids**

1367 **A** Antioxidant activity of plasmalogens (50 parts per million, ppm) “e MUFA” (P-  
1368 18:0/18:1) PC or “e PUFA” (P-16:0/20:4) PE and 3 ppm ferrostatin-1 (Fer-1) on  
1369 BODIPY-C11 oxidation in the presence of 50 ppm ester lipids (PE 18:0/22:6 and PE  
1370 16:0/20:4) in 2,2'-Azobis(2-amidinopropane) dihydrochloride (AAPH). Fer-1 is given as  
1371 control. Significance was evaluated by two-tailed t-test.

1372 **B** Peak area stability (LC-MS<sup>2</sup>) of PUFA ester lipids (PE 16:0/20:4) in presence of  
1373 plasmalogens in 2,2'-Azobis(2-amidinopropane) dihydrochloride (AAPH).

1374 **C** Cell viability of control cells incubated with 25  $\mu\text{M}$  plasmalogens (e MUFA and e  
1375 PUFA) or EtOH for 8 h then challenged with 0.3  $\mu\text{M}$  RSL3 in the presence of  $\alpha\text{Toc}$  in a  
1376 dose dependent manner.

1377 **D** Viability of *Ms4a15* OE cells pretreated with PUFAs eicosapentaenoic acid (C20:5,  
1378 EPA), docosapentaenoic acid (C22:5, DPA), and doxosahexaenoic acid (C22:6,  
1379 DHA) with ferroptosis induction by 2  $\mu\text{M}$  RSL3 and  $\alpha\text{Toc}$  rescue. Significance was  
1380 evaluated by two-tailed t-test.

1381 **E** RSL3 treatment of 72h siRNA knockdown of *Scd1*, *Fads2*, or *Hsd17b12* compared  
1382 to siGFP in control cells as individual experiments (left panel) or all three siRNAs  
1383 together (3x siRNA, right panel). Inset shows relative gene expression by qPCR (rel.  
1384 mRNA).

1385 **F** Heatmap showing dysregulation of genes involved in lipid droplet formation.

1386 **G** BODIPY 493/503 staining of lipid droplets of *Ms4a15* OE, control and 14 d Tgn-  
1387 treated cells. High-content images (upper) showing lipid droplet dispersion.  
1388 Quantification of lipid droplet number (LDs/cell) and area ( $\mu\text{m}^2/\text{cell}$ ) was performed by  
1389 Harmony software (PerkinElmer).

1390 **H** Analysis of average lipid droplet number and area (left) and fluorescence intensity  
1391 (right). Data were obtained from three independent experiments and a representative  
1392 experiment shown with analysis by Harmony software. Lipid droplet intensity is depicted  
1393 via a flow cytometry histogram of a representative experiment of three independent  
1394 repetitions. Significance was evaluated by two-tailed t-test.

1395 Cell-free assay and viability assays are reported as mean  $\pm$  SD of  $n = 3$  (**A,C,E**) or  $n =$   
1396 4 (**D**) technical replicates of three independent experiments with similar outcomes.  
1397 Curve statistics,  $p$ -values of two-way ANOVA, shown above comparisons.  $*P < 0.05$ ,  
1398  $**P < 0.01$ ,  $***P < 0.001$ ,  $****P < 0.0001$ .

1399

## 1400 **Fig. 6. Global $\text{Ca}^{2+}$ genes define a signature for ferroptosis sensitivity**

1401

1402 **A** PCA biplot of mRNA gene expression of RSL3 resistant/sensitive cell lines. The  
1403 distance between points approximates gene expression pattern differences among  
1404 groupings. Arrows indicate separating driver genes with greater biplot scores. Arrow  
1405 length indicates relative abundance differences in associated samples.

1406 **B** Dose response curves of control cells against RSL3 (0.4  $\mu\text{M}$ ) after 48 h pretreatment  
1407 with PLC activator *m*-3M3FBS and inactive analog *o*-3M3FBS. Addition of 10  $\mu\text{M}$   $\alpha\text{Toc}$   
1408 serves as rescue control.  $\text{Ca}^{2+}$  store depletion was detected by ionophore.

1409 **C** Volcano plot of lipid changes in 3M3FBS samples for *Ms4a15* OE modulated species.  
1410 Dot size indicates abundance of single lipid species.

1411 **D-F** Dose response curve of cell lines pretreated with PLC inhibitors (2  $\mu\text{M}$  U73122 +  
1412 1.5  $\mu\text{M}$  edelfosine, EDEL) for 48 h. RSL3 was applied for ferroptosis induction and  $\alpha\text{Toc}$   
1413 serves as rescue control. (**E**)  $\text{Ca}^{2+}$  store accumulation was detected by ionophore. (**F**)  
1414 Volcano plot of lipid changes for treated versus untreated (untr.) cells for *Ms4a15* OE  
1415 modulated species. Dot size indicates single species abundance.

1416 **G** Schematic overview of MS4A15-mediated ferroptosis resistance. Overexpression of  
1417 MS4A15 leads to ER  $\text{Ca}^{2+}$  store depletion, resulting in decreased PUFA- and long chain  
1418 acyl-lipids. Simultaneously, increased MUFAs and MUFA-plasmalogens act as ROS  
1419 sinks to protect cells from lipid peroxidation.

1420 Viability data are plotted as representative mean  $\pm$  SD of  $n = 3$  technical replicates for  
1421 independent experiments repeated at least three times with similar outcomes. Curve  
1422 statistics,  $p$ -values of two-way ANOVA, shown above comparisons.  $*P < 0.05$ ,  $**P$   
1423  $< 0.01$ ,  $***P < 0.001$ ,  $****P < 0.0001$ .

1424 **SUPPLEMENTARY FIGURE TITLES AND LEGENDS**

1425

1426 **Supplementary Fig. 1. *MS4A15* specifically regulates ferroptosis.**

1427 **A** (Left) Schematic of *Ms4a15* locus in MF cells. CRISPR-mediated mutagenesis was  
1428 directed to Exon 2, generating a homozygous 17-bp deletion with resulting frameshift  
1429 (red amino acid sequence) and truncation (\*). Inset and gel image show PCR  
1430 genotyping strategy with oligonucleotide (half-arrows) positions. A 1000 bp control  
1431 fragment detects genomic DNA; the 500 bp fragment positions the reverse primer to  
1432 the deletion. Wild type (WT) and *Ms4a15* knockout (-/-) amino acid sequences are  
1433 shown corresponding to bracketed area in (C). (Right) Survival of *Ms4a15* -/- cells  
1434 versus parental MF against RSL3 challenge.

1435 **B** Survival of *Ms4a15* OE cells compared to control against inducers of cell death:  
1436 50 nM staurosporine (Stauro) or 20 ng/mL tumor necrosis factor  $\alpha$  (TNF $\alpha$ ), with and  
1437 without supplementation (Supp) of 10  $\mu$ M z-VAD-FMK (zVAD); 1  $\mu$ g/mL  
1438 lipopolysaccharide (LPS)+10  $\mu$ M zVAD, with and without 10  $\mu$ M necrostatin-1 (Nec-1)  
1439 supplementation; or chemotherapeutics paclitaxel (PTX), etoposide, fluorouracil (5-FU),  
1440 doxorubicin (Doxo) and vinblastin.

1441 **C** Protein sequence alignment of human and mouse MS4A15. Conserved amino acid  
1442 residues are shadowed in red.

1443 **D** Viability of HT1080 and Calu-1 *MS4A15* siRNA knockdown cells challenged with  
1444 RSL3 compared to GFP siRNA control. Inset shows relative *MS4A15* expression by  
1445 qPCR (rel. mRNA).

1446 **E** *MS4A15* expression level from 517 LUAD primary lung adenocarcinoma samples  
1447 (left panel) correlated with single sample Gene Set Enrichment Analysis (GSEA) *cell*  
1448 *line\_cell\_adhesion*. *MS4A15* expression is contrasted with established cell culture lines  
1449 (right panel, CCLE lung cancer cell expression data from 188 cell lines) where  
1450 expression is mostly lost.

1451 **F** Digital phase contrast images of *Ms4a15* OE and control cells in a wound healing  
1452 assay. The cells were tracked for 8 h and the average speed was calculated by  
1453 Harmony software.

1454 **G** Kaplan-Meier survival analysis for LUAD patients with high and low *MS4A15*  
1455 expression levels. Data from 506 patients were calculated by best-cut point method in  
1456 survival, patients were classified into low- and high-expression level of *MS4A15* groups  
1457 by  $\log_2(\text{RSEM}+1)$  value 4.7. HR value, CI and P value were obtained by the invariable  
1458 Cox analysis.

1459 **H** Western blots of MS4A15 protein expression in *Ms4a15* OE and control cells after  
1460 0.5  $\mu$ M RSL3 treatment over a 4 h time course.  $\beta$ -Actin serves as loading control.

1461 **I** Heatmap showing detected ferroptosis-related proteins <sup>1</sup> by mass spectrometry of  
1462 *Ms4a15* OE and control cells, five replicates per sample.

1463 **J** Localization of MS4A15 in Calu-1 cells. MS4A15-FLAG (Red) and ER tracker  
1464 (Green). Scale bar, 10  $\mu$ m.

1465 Viability data are plotted as representative mean  $\pm$  SD of  $n = 3$  technical replicates for  
1466 independent experiments repeated at least three times with similar outcomes. Curve  
1467 statistics,  $p$ -values of two-way ANOVA, shown above comparisons. \* $P < 0.05$ , \*\* $P$   
1468  $< 0.01$ , \*\*\* $P < 0.001$ , \*\*\*\* $P < 0.0001$ .

1469 **Supplementary Fig. 2. MS4A15 informatics defines intracellular Ca<sup>2+</sup> role.**

1470 **A** ssGSEA shows the correlation between *MS4A15* and enriched gene ontology (GO)  
1471 pathways in solid lung tumors.

1472 **B** Heat map of the top genes associated with *MS4A15* in 517 LUAD primary lung  
1473 cancers.

1474 **C** *MS4A15* expression correlated with calcium regulators *CLIC5*, *TNNC1* and *SUSD2*.

1475 **D** ssGSEA correlation between *CLIC5*, *TNNC1*, and *SUSD2* expression and regulation  
1476 of calcium ion transmembrane transporters in primary lung tumors.  $\log_2(\text{RSEM}+1)$   
1477 values indicate expression level.

1478 **E** Localization of MS4A15-FLAG (red) and IP<sub>3</sub>R1 (green) in Calu-1 cells. Scale bar,  
1479 10  $\mu$ m.

1480

1481 **Supplementary Fig. 3. MS4A15 upregulation regulates calcium homeostasis.**

1482 **A** Western blots of ERK/STAT/AKT signaling proteins in *Ms4a15* OE and control cells  
1483 after 15 min EGF treatment with concentrations of 0-4 ng/ml. 'p' indicates the  
1484 phosphorylated, or active, isoform. A vertical line denotes separate Western blots.

1485 **B-C** Dose response curves against RSL3 treatment of *Ms4a15* OE and control cells  
1486 concurrently treated with **(B)** CoCl<sub>2</sub> or **(C)** calcium ionophore. Addition of 10  $\mu$ M  $\alpha$ Toc  
1487 serves as rescue control for ferroptosis.

1488 **D** *Orai1-3* gene expression in *Ms4a15* OE compared to control cells.

1489 **E** viability of control cells treated with BAPTA-AM to block SOCE.

1490 **F** Dose-dependent sensitization of control cells to RSL3 by overexpressing *Serca2*  
1491 (control + *Serca2* OE) or empty virus control (control + mock). Insets show SERCA2  
1492 expression by Western and viability (PI%) measurements in respective cell.

1493 **G** *Xbp1* Sashimi plot, splicing in *Ms4a15* OE compared to control cells.

1494 **H** UPR gene expression in *Ms4a15* OE compared to control.

1495 **I** Survival of control cells against RSL3 (0.2  $\mu$ M) after 0 h and 32 h tunicamycin (4nM)  
1496 pretreatment to induce ER stress, respectively. Statistics, two-tailed t-test.

1497 Expression data are shown as mean  $\pm$  SD of  $n = 5$  technical replicates. Viability data  
1498 are plotted as representative mean  $\pm$  SD of  $n = 3$  (**B-D**) or 4 (**H**) technical replicates for  
1499 independent experiments repeated at least three times with similar outcomes. Curve  
1500 statistics,  $p$ -values of two-way ANOVA comparisons are shown., \* $P < 0.05$ , \*\* $P < 0.01$ ,  
1501 \*\*\* $P < 0.001$ , \*\*\*\* $P < 0.0001$ .

1502

#### 1503 **Supplementary Fig. 4. Lipid metabolites in *Ms4a15* OE cells.**

1504 **A-B** PCA indicates separation between Tgn<sup>long</sup> and *Ms4a15* OE from Tgn<sup>short</sup> and  
1505 control cells in positive (**A**) and negative (**B**) electrospray. (GP, Glycerophospholipid;  
1506 GL, Glycerolipid; ST, Sterols; FA, Fatty acids (Sud et al., 2007)).

1507 **C** Pie chart of important lipid classes for ESI- ( $p < 0.05$ ,  $n = 3$ , two sided Welch test).

1508 **D** Volcano plot of main glycerophospholipids in ESI- ( $p < 0.05$ ,  $n = 3$ , two sided Welch  
1509 test).

1510 **E** Significantly modulated GL species in *Ms4a15* OE ( $p < 0.05$ ,  $n = 3$ , two sided Welch  
1511 test).

1512 **F** Significantly modulated GPs belonging to GP classes of PI, PA and PS in *Ms4a15*  
1513 OE & Tgn<sup>long</sup> compared to control and Tgn<sup>short</sup> ( $p < 0.05$ ,  $n = 3$ , two sided Welch test).

1514 **G** All important modulated lipids species are plotted with their intensity. A few species  
1515 account for the major lipid content while the remaining species are of minor importance  
1516 as ranked by abundance.

1517 **H** Pie chart showing summed intensity of all importantly modulated lipids species.

1518 **I** RKMD plot of annotated Lyso glycerophospho-ethanolamines and –cholines (1ppm  
1519 m/z error)

1520 **J** RKMD plot of annotated Lyso ether glycerophospho-ethanolamines and –cholines  
1521 (1ppm m/z error).

1522

#### 1523 **Supplementary Fig. 5. Metabolomics analysis and cell viability.**

1524 **A-B** Volcano plot of affected lipids in *Ms4a15* knockout MF (**A**) or siRNA knockdown  
1525 (**B**) Calu-1 and HT-1080 cells from S1E, of species found modulated in *Ms4a15* OE.  
1526 Dot sizes indicates abundance of single lipid species.

1527 **C-D** Volcano plot for metabolomics screening ESI+ (**C**) and ESI- (**D**) ( $n = 5$ ,  $p < 0.05$ ,  
1528 Wilcoxon-Mann-Whitney-Test, BH corrected). Significantly modulated m/z were  
1529 annotated using given databases (1 ppm mass error). The most important m/z are  
1530 annotated lipids ( $n = 5$ ,  $p < 0.05$ , Wilcoxon-Mann-Whitney-Test, BH corrected).

1531 **E** CoQ<sub>10</sub> and GSH abundances (annotated with 1 ppm mass error).

1532 **F** Cell viability of control cells supplemented with 25  $\mu$ M plasmalogens (e MUFA  
1533 C18/18:1 PC and e PUFA C18/22:6 PE) or EtOH challenged with 0.3  $\mu$ M RSL3.  $\alpha$ Toc  
1534 serves as rescue control.

1535

### 1536 **Supplementary Fig. 6. Ca<sup>2+</sup> genes in ferroptosis and cell viability.**

1537 **A** Excerpt of mRNA expression heatmap of KEGG calcium genes in RSL3-resistant  
1538 (blue) and RSL-sensitive (gray) cell lines from CTRP database. See also  
1539 Supplementary Table 4.

1540 **B** Dose response curve of *Olfir39*-overexpressing immortalized mouse fibroblasts  
1541 (*Olfir39* OE) compared to control cells against RSL3 and IKE treatment (16 h).  $\alpha$ Toc  
1542 serves as rescue control for ferroptosis. Statistics refer to upper panel.

1543 **C** Calcium levels detected by cytosolic sensor GCaMP6s as in **Fig. 2E**. 50 nM  
1544 Bradykinin ( $\Delta$ ) or 5  $\mu$ M Ionophore ( $\wedge$ ) in *Olfir39* OE compared to control cells in Ca<sup>2+</sup>-  
1545 free buffer. Addition of 2 mM CaCl<sub>2</sub> ( $\blacktriangle$ ). Data shown are representative results of three  
1546 independent repetitions performed in triplicate with similar outcomes.

1547 **D** Volcano plot of *Olfir39* OE affected lipids, for Ms4a15 OE modulated species. Dot  
1548 sizes indicates abundance of single lipid species.

1549 **E** Dose response curve of unresponsive cell lines pretreated with PLC inhibitors (2  $\mu$ M  
1550 U73122 + 1.5  $\mu$ M edelfosine, EDEL) for 48 h. RSL3 was applied for ferroptosis  
1551 induction and  $\alpha$ Toc serves as rescue control.

1552 Viability data are plotted as representative mean  $\pm$  SD of  $n = 3$  technical replicates for  
1553 independent experiments repeated at least three times with similar outcomes.  $p$ -values  
1554 of two-way ANOVA comparisons are shown., \* $P < 0.05$ , \*\* $P < 0.01$ , \*\*\* $P < 0.001$ , \*\*\*\* $P$   
1555  $< 0.0001$ . \* $P < 0.05$ , \*\* $P < 0.01$ , \*\*\* $P < 0.001$ , \*\*\*\* $P < 0.0001$ .

1556

### 1557 **EXCEL TABLE TITLES AND LEGENDS**

1558

1559 **Supplementary Table 1. Raw data of lipidomics analysis.** Related to Fig. 3, 4, and  
1560 5, Supplementary Fig. 4.

1561 file: RAW DATA LIPIDOMICS.xlsx

1562

1563 **Supplementary Table 2. Based on MS<sup>2</sup> fragmentation pattern identified**  
1564 **phospholipids.** Related to Fig. 4 and 5.

1565 file: DATA MSMS.xlsx

1566

1567 **Supplementary Table 3. Raw data for metabolomics analysis.** Related to  
1568 Supplementary Fig. 5.

1569 file: RAW DATA METABOLOMICS.xlsx

1570

1571 **Supplementary Table 4. CCLE expression data and full heatmap.**

1572 Expression levels of KEGG calcium signaling pathway genes were normalized and  
1573 clustered by hierarchy according to Euclidean distance of top 100 most resistant (red)  
1574 and sensitive (black) cell lines from CTRP database based on RSL3 viability (area  
1575 under curve).

1576 file: HEATMAP DATA.xlsx

1577

1578 **Supplementary Table 5. Oligonucleotide sequences used in this study.**

1579 file: PRIMER SEQUENCES.xlsx
